# Supplementary material
Source: PubMed Central journal article supplement (PMC9492682)

**Figure S1.** The SARS-CoV-2 predominant lineages distribution in Ukraine.

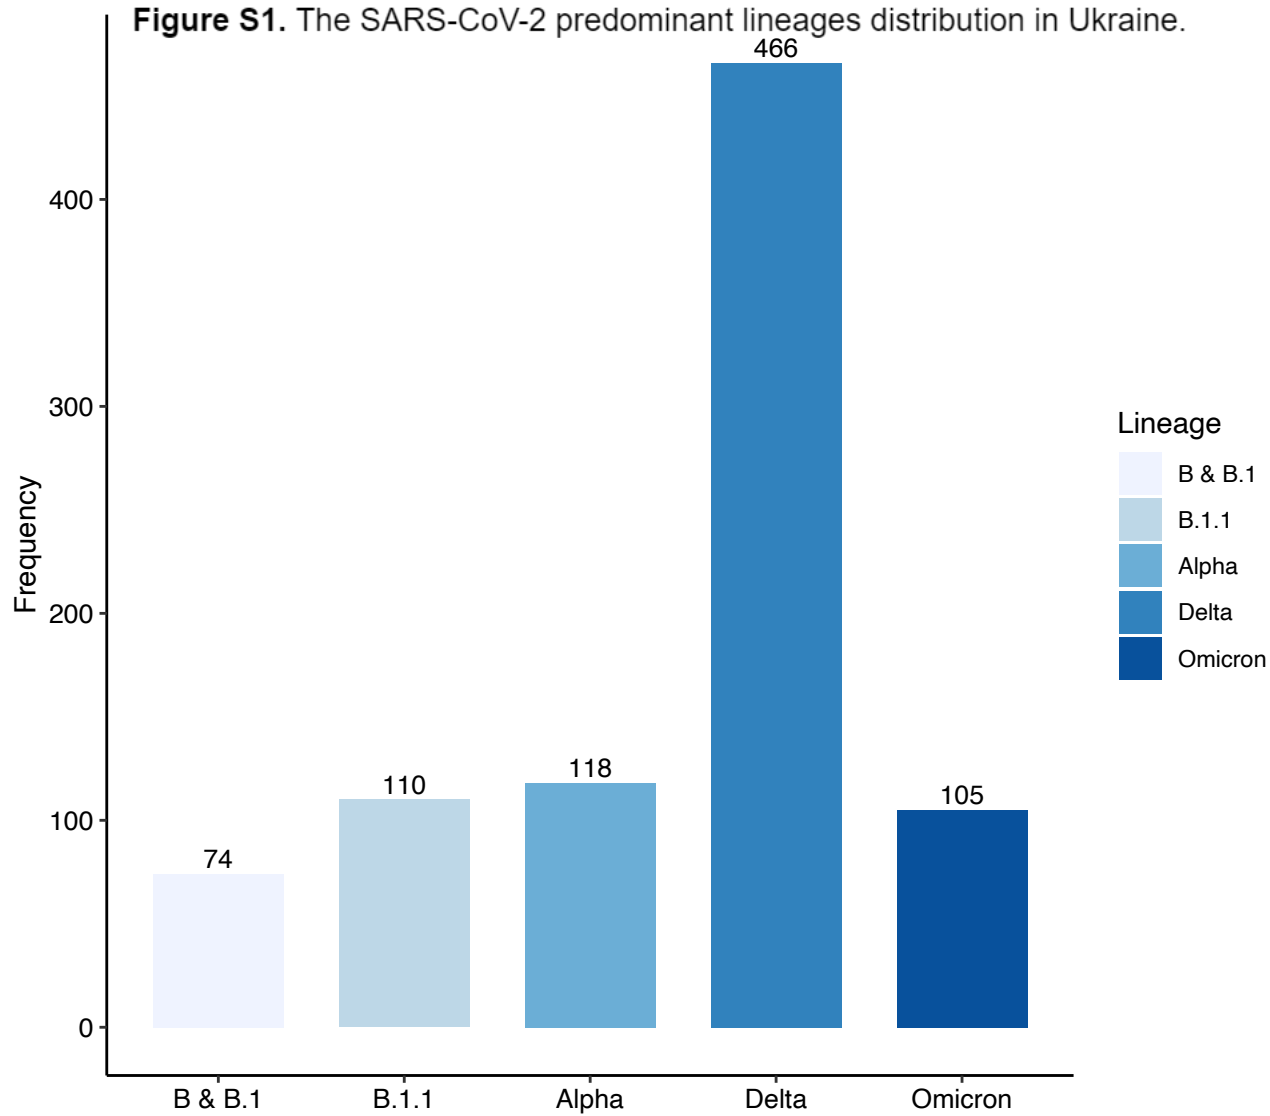

Supplement: 41598_2022_19414_MOESM1_ESM.pdf [file 41598_2022_19414_MOESM1_ESM.pdf]
