# Supplementary material
Source: PubMed Central journal article supplement (PMC9492682)

**Figure S2.** The number of SARS-CoV-2 sequences and COVID-19 cases from each epidemic wave in Ukraine. The sequence data represent approximately 0.02% of the total COVID-19 confirmed cases.

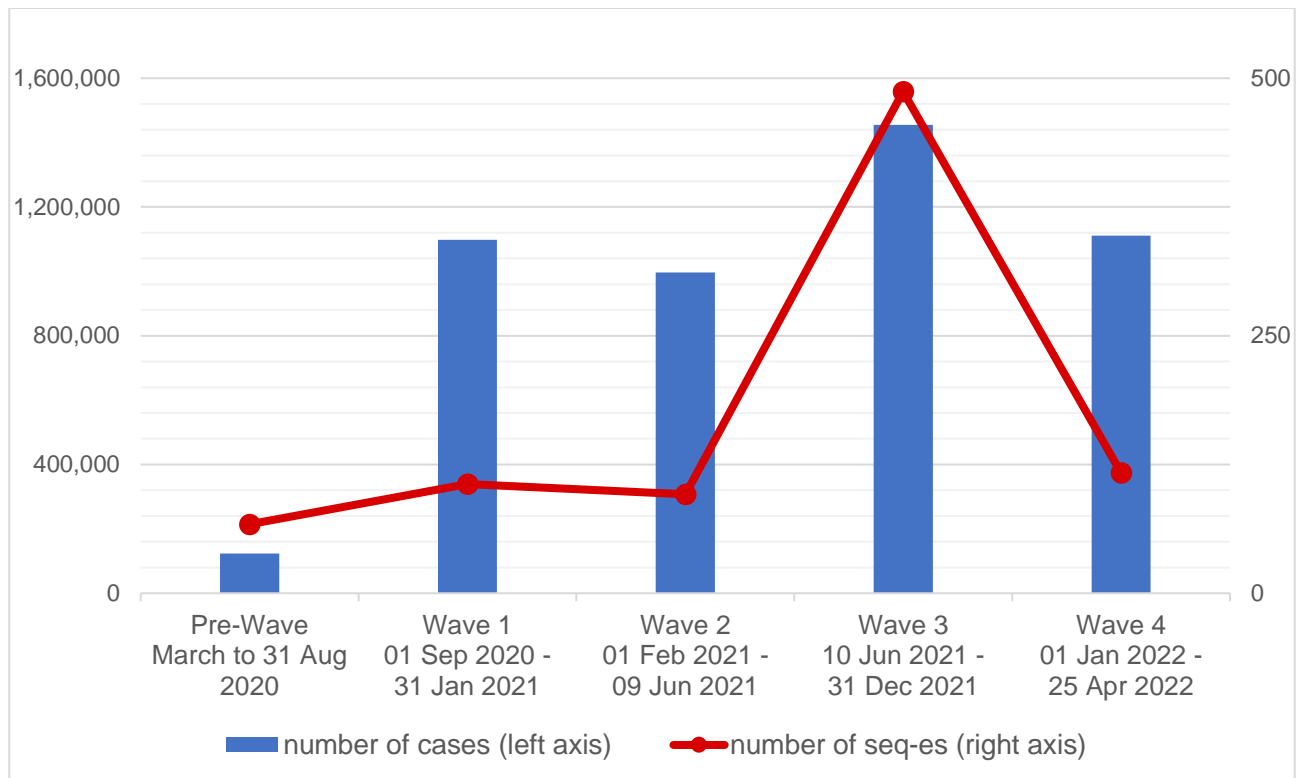

Supplement: 41598_2022_19414_MOESM2_ESM.pdf [file 41598_2022_19414_MOESM2_ESM.pdf]
