# Supplementary material
Source: PubMed Central journal article supplement (PMC9492682)

**Figure S3.** Phylogenetic tree of the SARS-CoV-2 Delta variant sequences circulating in summer 2021 and selected for phylogeographic analysis. Red circles indicate the SARS-CoV-2 Delta genomes from Ukraine.

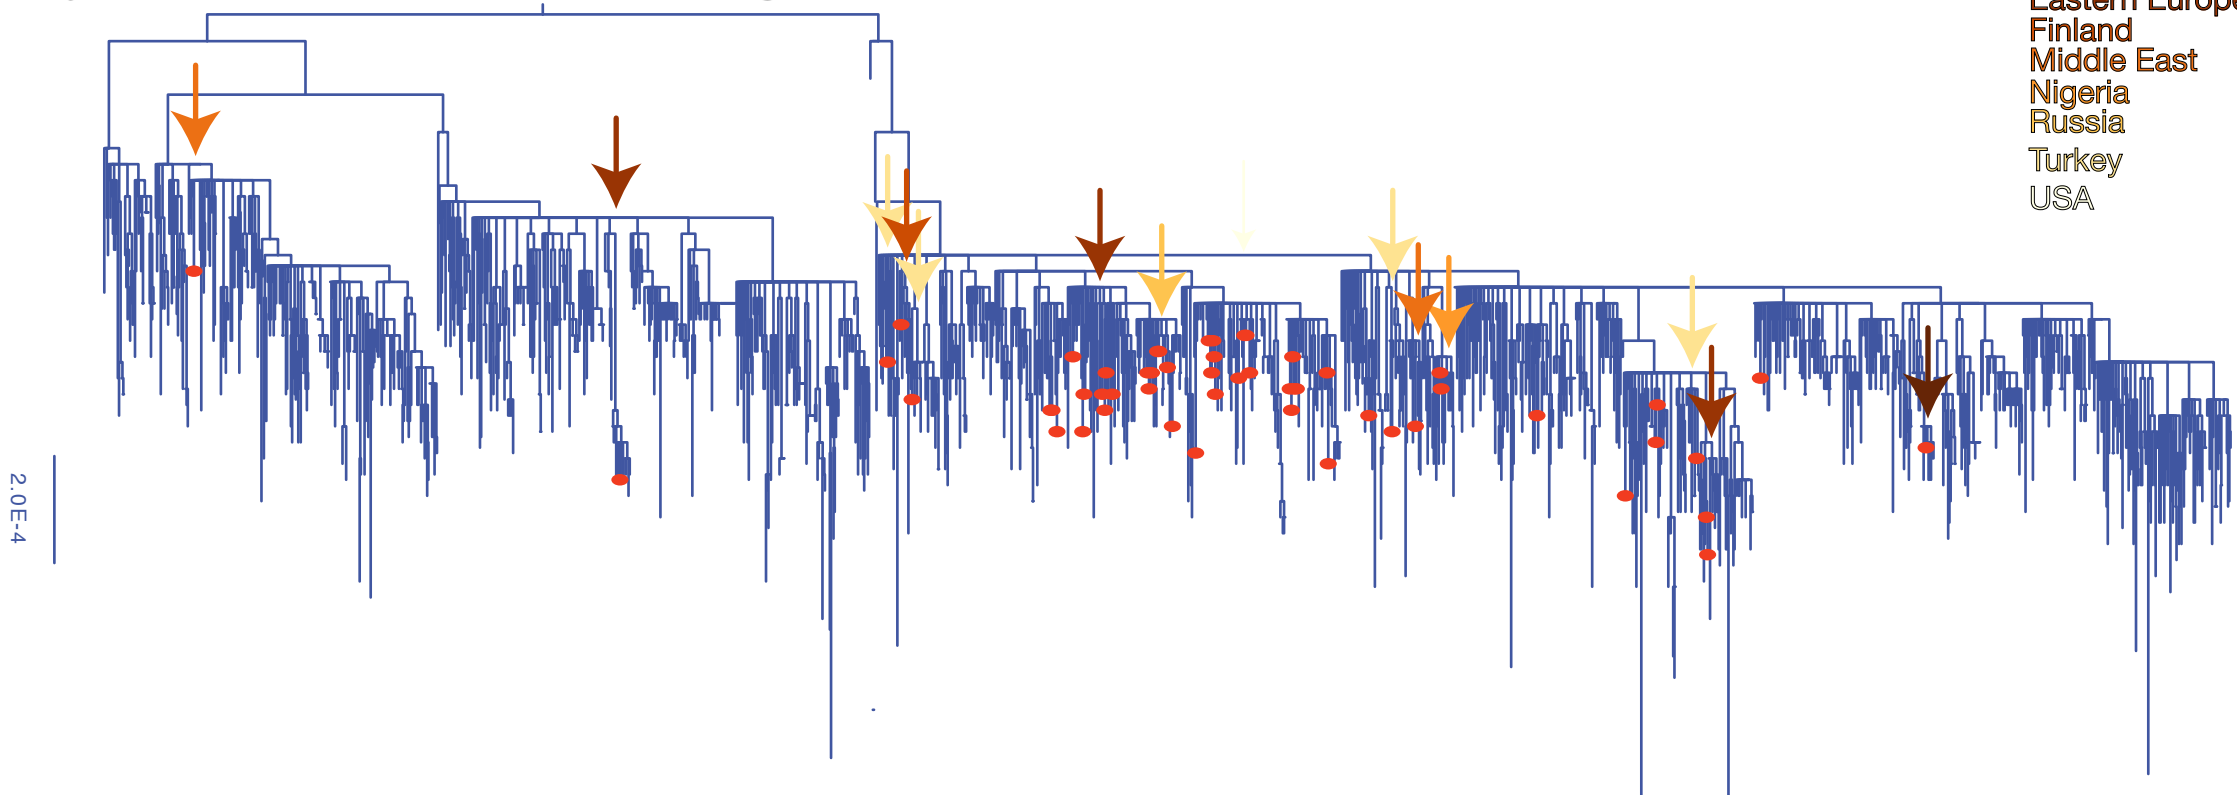

Supplement: 41598_2022_19414_MOESM3_ESM.pdf [file 41598_2022_19414_MOESM3_ESM.pdf]
