# Supplementary material
Source: PubMed Central journal article supplement (PMC9492682)
Supplement: 41598_2022_19414_MOESM4_ESM.pdf [file 41598_2022_19414_MOESM4_ESM.pdf]

**Table S4. Acknowledgement GISAID table.**

We gratefully acknowledge the following Authors from the Originating laboratories responsible for obtaining the specimens, as well as the Submitting laboratories where the genome data were generated and shared via GISAID, on which this research is based.

All Submitters of data may be contacted directly via [www.gisaid.org](http://www.gisaid.org)

| Accession ID                                                                                                                                                                                                                                                                                                                                                                                                                                                                                                                                                                                                                                                                                                                                                                                                                                                                                                                                                                                                                                                                                                                                                                                                                                                                                                                                                                                                                                                                                                                                                                                                                                                                                                                                                                                                                                                                                                                                                                                                                                                                                                                                                                                                                                                                                                                                                                                                                                                                                                                                                                                                                                                                                                                                                                                                                                                                                                                                                                                                                                                                                                                                                                                                                                                                                                                                                                                                                                                                                                                                                                                                                                                                                                                                                                                                                                                                                                                                                                                                                                                                                                                                                                                                                                                                                                                                                                                                                                                                                                                                                                                                                                                                                                                                                                                                                                                                                                                                                                                                                                                                                                                                                                                                                                                                                                                                                                                                                                                                                                                                                                                                                                                                                                                                                                                                                                                                                                                                                                                                                                                                                                                                                                                                                                                                                                                                                                                                                                                                                                                                                                                                                                                                                                                                                                                                                                                                                                                                                                                                                                                                                                                                                                                                                                                                                                                                                                                                                                                                                                                                                                                                                                                                                                                                                                                                                                                                                                                                                                                                                                                                                                                                                                                                                                                                                                                                                                                                                                                                                                                                                                                                                                                                                                                                                                                                                                                                                                                                                                                                                                                                                   | Originating Laboratory                                                                                                                         | Submitting Laboratory                                                                                                                                     | Authors                                                                                                                                                                            |                                                                                                                                                                                                                                                                                                                                                                   |
|------------------------------------------------------------------------------------------------------------------------------------------------------------------------------------------------------------------------------------------------------------------------------------------------------------------------------------------------------------------------------------------------------------------------------------------------------------------------------------------------------------------------------------------------------------------------------------------------------------------------------------------------------------------------------------------------------------------------------------------------------------------------------------------------------------------------------------------------------------------------------------------------------------------------------------------------------------------------------------------------------------------------------------------------------------------------------------------------------------------------------------------------------------------------------------------------------------------------------------------------------------------------------------------------------------------------------------------------------------------------------------------------------------------------------------------------------------------------------------------------------------------------------------------------------------------------------------------------------------------------------------------------------------------------------------------------------------------------------------------------------------------------------------------------------------------------------------------------------------------------------------------------------------------------------------------------------------------------------------------------------------------------------------------------------------------------------------------------------------------------------------------------------------------------------------------------------------------------------------------------------------------------------------------------------------------------------------------------------------------------------------------------------------------------------------------------------------------------------------------------------------------------------------------------------------------------------------------------------------------------------------------------------------------------------------------------------------------------------------------------------------------------------------------------------------------------------------------------------------------------------------------------------------------------------------------------------------------------------------------------------------------------------------------------------------------------------------------------------------------------------------------------------------------------------------------------------------------------------------------------------------------------------------------------------------------------------------------------------------------------------------------------------------------------------------------------------------------------------------------------------------------------------------------------------------------------------------------------------------------------------------------------------------------------------------------------------------------------------------------------------------------------------------------------------------------------------------------------------------------------------------------------------------------------------------------------------------------------------------------------------------------------------------------------------------------------------------------------------------------------------------------------------------------------------------------------------------------------------------------------------------------------------------------------------------------------------------------------------------------------------------------------------------------------------------------------------------------------------------------------------------------------------------------------------------------------------------------------------------------------------------------------------------------------------------------------------------------------------------------------------------------------------------------------------------------------------------------------------------------------------------------------------------------------------------------------------------------------------------------------------------------------------------------------------------------------------------------------------------------------------------------------------------------------------------------------------------------------------------------------------------------------------------------------------------------------------------------------------------------------------------------------------------------------------------------------------------------------------------------------------------------------------------------------------------------------------------------------------------------------------------------------------------------------------------------------------------------------------------------------------------------------------------------------------------------------------------------------------------------------------------------------------------------------------------------------------------------------------------------------------------------------------------------------------------------------------------------------------------------------------------------------------------------------------------------------------------------------------------------------------------------------------------------------------------------------------------------------------------------------------------------------------------------------------------------------------------------------------------------------------------------------------------------------------------------------------------------------------------------------------------------------------------------------------------------------------------------------------------------------------------------------------------------------------------------------------------------------------------------------------------------------------------------------------------------------------------------------------------------------------------------------------------------------------------------------------------------------------------------------------------------------------------------------------------------------------------------------------------------------------------------------------------------------------------------------------------------------------------------------------------------------------------------------------------------------------------------------------------------------------------------------------------------------------------------------------------------------------------------------------------------------------------------------------------------------------------------------------------------------------------------------------------------------------------------------------------------------------------------------------------------------------------------------------------------------------------------------------------------------------------------------------------------------------------------------------------------------------------------------------------------------------------------------------------------------------------------------------------------------------------------------------------------------------------------------------------------------------------------------------------------------------------------------------------------------------------------------------------------------------------------------------------------------------------------------------------------------------------------------------------------------------------------------------------------------------------------------------------------------------------------------------------------------------------------------------------------------------------------------------------------------------------------------------------------------------------------------------------------------------------------------------------------------------------------------------------------------|------------------------------------------------------------------------------------------------------------------------------------------------|-----------------------------------------------------------------------------------------------------------------------------------------------------------|------------------------------------------------------------------------------------------------------------------------------------------------------------------------------------|-------------------------------------------------------------------------------------------------------------------------------------------------------------------------------------------------------------------------------------------------------------------------------------------------------------------------------------------------------------------|
| EPI_ISL_1298483, EPI_ISL_1298488<br>EPI_ISL_1298474                                                                                                                                                                                                                                                                                                                                                                                                                                                                                                                                                                                                                                                                                                                                                                                                                                                                                                                                                                                                                                                                                                                                                                                                                                                                                                                                                                                                                                                                                                                                                                                                                                                                                                                                                                                                                                                                                                                                                                                                                                                                                                                                                                                                                                                                                                                                                                                                                                                                                                                                                                                                                                                                                                                                                                                                                                                                                                                                                                                                                                                                                                                                                                                                                                                                                                                                                                                                                                                                                                                                                                                                                                                                                                                                                                                                                                                                                                                                                                                                                                                                                                                                                                                                                                                                                                                                                                                                                                                                                                                                                                                                                                                                                                                                                                                                                                                                                                                                                                                                                                                                                                                                                                                                                                                                                                                                                                                                                                                                                                                                                                                                                                                                                                                                                                                                                                                                                                                                                                                                                                                                                                                                                                                                                                                                                                                                                                                                                                                                                                                                                                                                                                                                                                                                                                                                                                                                                                                                                                                                                                                                                                                                                                                                                                                                                                                                                                                                                                                                                                                                                                                                                                                                                                                                                                                                                                                                                                                                                                                                                                                                                                                                                                                                                                                                                                                                                                                                                                                                                                                                                                                                                                                                                                                                                                                                                                                                                                                                                                                                                                            | Bogorodchany CRH<br>Burshtyn CCH                                                                                                               | The Institute of Molecular Biology and Genetics of NASU<br>The Institute of Molecular Biology and Genetics of NASU                                        | M.Tukalo et al.<br>M.Tukalo et al.                                                                                                                                                 |                                                                                                                                                                                                                                                                                                                                                                   |
| EPI_ISL_576146, EPI_ISL_576147,<br>EPI_ISL_576148, EPI_ISL_576149                                                                                                                                                                                                                                                                                                                                                                                                                                                                                                                                                                                                                                                                                                                                                                                                                                                                                                                                                                                                                                                                                                                                                                                                                                                                                                                                                                                                                                                                                                                                                                                                                                                                                                                                                                                                                                                                                                                                                                                                                                                                                                                                                                                                                                                                                                                                                                                                                                                                                                                                                                                                                                                                                                                                                                                                                                                                                                                                                                                                                                                                                                                                                                                                                                                                                                                                                                                                                                                                                                                                                                                                                                                                                                                                                                                                                                                                                                                                                                                                                                                                                                                                                                                                                                                                                                                                                                                                                                                                                                                                                                                                                                                                                                                                                                                                                                                                                                                                                                                                                                                                                                                                                                                                                                                                                                                                                                                                                                                                                                                                                                                                                                                                                                                                                                                                                                                                                                                                                                                                                                                                                                                                                                                                                                                                                                                                                                                                                                                                                                                                                                                                                                                                                                                                                                                                                                                                                                                                                                                                                                                                                                                                                                                                                                                                                                                                                                                                                                                                                                                                                                                                                                                                                                                                                                                                                                                                                                                                                                                                                                                                                                                                                                                                                                                                                                                                                                                                                                                                                                                                                                                                                                                                                                                                                                                                                                                                                                                                                                                                                              | Department of Respiratory & Other Viral Infections of L.V. Gromashevsky<br>Institute of Epidemiology & Infectious Diseases NAMS of Ukraine     | Department of Respiratory & Other Viral Infections of L.V. Gromashevsky Institute<br>of Epidemiology & Infectious Diseases NAMS of Ukraine, JSC "Farmak"  | Alla Mironenko; Andriy Goy; Ihor Kravchuk; Larysa Radchenko; Liudmyla Bolotova; Natalia Teteriuk                                                                                   |                                                                                                                                                                                                                                                                                                                                                                   |
| EPI_ISL_4260382, EPI_ISL_4260384, EPI_ISL_4260386, EPI_ISL_4260388, EPI_ISL_4260390, EPI_ISL_4260392, EPI_ISL_4260393, EPI_ISL_4260395, EPI_ISL_4260396, EPI_ISL_4260398, EPI_ISL_4260400, EPI_ISL_4260402, EPI_ISL_4260404, EPI_ISL_4260406, EPI_ISL_4260408, EPI_ISL_4260410, EPI_ISL_4260411, EPI_ISL_4260413, EPI_ISL_4260414, EPI_ISL_4260416, EPI_ISL_4260418, EPI_ISL_4260420, EPI_ISL_4260424, EPI_ISL_4260427, EPI_ISL_4260429, EPI_ISL_4260430, EPI_ISL_4260432, EPI_ISL_4260438, EPI_ISL_4260440, EPI_ISL_4260442, EPI_ISL_4260444, EPI_ISL_4260445, EPI_ISL_4260449, EPI_ISL_4260450                                                                                                                                                                                                                                                                                                                                                                                                                                                                                                                                                                                                                                                                                                                                                                                                                                                                                                                                                                                                                                                                                                                                                                                                                                                                                                                                                                                                                                                                                                                                                                                                                                                                                                                                                                                                                                                                                                                                                                                                                                                                                                                                                                                                                                                                                                                                                                                                                                                                                                                                                                                                                                                                                                                                                                                                                                                                                                                                                                                                                                                                                                                                                                                                                                                                                                                                                                                                                                                                                                                                                                                                                                                                                                                                                                                                                                                                                                                                                                                                                                                                                                                                                                                                                                                                                                                                                                                                                                                                                                                                                                                                                                                                                                                                                                                                                                                                                                                                                                                                                                                                                                                                                                                                                                                                                                                                                                                                                                                                                                                                                                                                                                                                                                                                                                                                                                                                                                                                                                                                                                                                                                                                                                                                                                                                                                                                                                                                                                                                                                                                                                                                                                                                                                                                                                                                                                                                                                                                                                                                                                                                                                                                                                                                                                                                                                                                                                                                                                                                                                                                                                                                                                                                                                                                                                                                                                                                                                                                                                                                                                                                                                                                                                                                                                                                                                                                                                                                                                                                                               | Department of Respiratory and other Viral Infections of L.V. Gromashevsky<br>Institute of Epidemiology and Infectious Diseases NAMS of Ukraine | CNR Virus des Infections Respiratoires - France SUD                                                                                                       | Alla Mironenko; Antonin Bal; Bruno Lina; Gregory Destras; Gwendolynne Burfin; Hadrien Regue; Larysa Radchenko; Laurence Josset; Martine Valette; Natalia Teteriuk; Quentin Semanas |                                                                                                                                                                                                                                                                                                                                                                   |
| see above                                                                                                                                                                                                                                                                                                                                                                                                                                                                                                                                                                                                                                                                                                                                                                                                                                                                                                                                                                                                                                                                                                                                                                                                                                                                                                                                                                                                                                                                                                                                                                                                                                                                                                                                                                                                                                                                                                                                                                                                                                                                                                                                                                                                                                                                                                                                                                                                                                                                                                                                                                                                                                                                                                                                                                                                                                                                                                                                                                                                                                                                                                                                                                                                                                                                                                                                                                                                                                                                                                                                                                                                                                                                                                                                                                                                                                                                                                                                                                                                                                                                                                                                                                                                                                                                                                                                                                                                                                                                                                                                                                                                                                                                                                                                                                                                                                                                                                                                                                                                                                                                                                                                                                                                                                                                                                                                                                                                                                                                                                                                                                                                                                                                                                                                                                                                                                                                                                                                                                                                                                                                                                                                                                                                                                                                                                                                                                                                                                                                                                                                                                                                                                                                                                                                                                                                                                                                                                                                                                                                                                                                                                                                                                                                                                                                                                                                                                                                                                                                                                                                                                                                                                                                                                                                                                                                                                                                                                                                                                                                                                                                                                                                                                                                                                                                                                                                                                                                                                                                                                                                                                                                                                                                                                                                                                                                                                                                                                                                                                                                                                                                                      | Department of Respiratory and other Viral Infections of L.V. Gromashevsky<br>Institute of Epidemiology and Infectious Diseases NAMS of Ukraine |                                                                                                                                                           |                                                                                                                                                                                    |                                                                                                                                                                                                                                                                                                                                                                   |
| EPI_ISL_582509                                                                                                                                                                                                                                                                                                                                                                                                                                                                                                                                                                                                                                                                                                                                                                                                                                                                                                                                                                                                                                                                                                                                                                                                                                                                                                                                                                                                                                                                                                                                                                                                                                                                                                                                                                                                                                                                                                                                                                                                                                                                                                                                                                                                                                                                                                                                                                                                                                                                                                                                                                                                                                                                                                                                                                                                                                                                                                                                                                                                                                                                                                                                                                                                                                                                                                                                                                                                                                                                                                                                                                                                                                                                                                                                                                                                                                                                                                                                                                                                                                                                                                                                                                                                                                                                                                                                                                                                                                                                                                                                                                                                                                                                                                                                                                                                                                                                                                                                                                                                                                                                                                                                                                                                                                                                                                                                                                                                                                                                                                                                                                                                                                                                                                                                                                                                                                                                                                                                                                                                                                                                                                                                                                                                                                                                                                                                                                                                                                                                                                                                                                                                                                                                                                                                                                                                                                                                                                                                                                                                                                                                                                                                                                                                                                                                                                                                                                                                                                                                                                                                                                                                                                                                                                                                                                                                                                                                                                                                                                                                                                                                                                                                                                                                                                                                                                                                                                                                                                                                                                                                                                                                                                                                                                                                                                                                                                                                                                                                                                                                                                                                                 | Department of Respiratory and other Viral Infections of L.V.Gromashevsky<br>Institute of Epidemiology & Infectious Diseases NAMS of Ukraine    | Department of Respiratory and other Viral Infections of L.V.Gromashevsky<br>Institute of Epidemiology & Infectious Diseases NAMS of Ukraine, JSC "Farmak" | Alla Mironenko; Andriy Goy; Ihor Kravchuk; Larysa Radchenko; Liudmyla Bolotova; Natalia Teteriuk                                                                                   |                                                                                                                                                                                                                                                                                                                                                                   |
| EPI_ISL_582510                                                                                                                                                                                                                                                                                                                                                                                                                                                                                                                                                                                                                                                                                                                                                                                                                                                                                                                                                                                                                                                                                                                                                                                                                                                                                                                                                                                                                                                                                                                                                                                                                                                                                                                                                                                                                                                                                                                                                                                                                                                                                                                                                                                                                                                                                                                                                                                                                                                                                                                                                                                                                                                                                                                                                                                                                                                                                                                                                                                                                                                                                                                                                                                                                                                                                                                                                                                                                                                                                                                                                                                                                                                                                                                                                                                                                                                                                                                                                                                                                                                                                                                                                                                                                                                                                                                                                                                                                                                                                                                                                                                                                                                                                                                                                                                                                                                                                                                                                                                                                                                                                                                                                                                                                                                                                                                                                                                                                                                                                                                                                                                                                                                                                                                                                                                                                                                                                                                                                                                                                                                                                                                                                                                                                                                                                                                                                                                                                                                                                                                                                                                                                                                                                                                                                                                                                                                                                                                                                                                                                                                                                                                                                                                                                                                                                                                                                                                                                                                                                                                                                                                                                                                                                                                                                                                                                                                                                                                                                                                                                                                                                                                                                                                                                                                                                                                                                                                                                                                                                                                                                                                                                                                                                                                                                                                                                                                                                                                                                                                                                                                                                 | Department of Respiratory and other Viral Infections of L.V.Gromashevsky<br>Institute of Epidemiology & Infectious Diseases NAMS of Ukraine    | Department of Respiratory and other Viral Infections of L.V.Gromashevsky<br>Institute of Epidemiology & Infectious Diseases NAMS of Ukraine, JSC "Farmak" | Alla Mironenko; Andriy Goy; Ihor Kravchuk; Larysa Radchenko; Liudmyla Bolotova; Natalia Teteriuk                                                                                   |                                                                                                                                                                                                                                                                                                                                                                   |
| EPI_ISL_582511, EPI_ISL_582512, EPI_ISL_582513, EPI_ISL_654819, EPI_ISL_654820, EPI_ISL_979970, EPI_ISL_979971, EPI_ISL_979972, EPI_ISL_979973, EPI_ISL_1121990, EPI_ISL_1121991, EPI_ISL_1121992, EPI_ISL_1122014, EPI_ISL_1315427, EPI_ISL_1315475, EPI_ISL_1315476, EPI_ISL_1315477, EPI_ISL_1315478                                                                                                                                                                                                                                                                                                                                                                                                                                                                                                                                                                                                                                                                                                                                                                                                                                                                                                                                                                                                                                                                                                                                                                                                                                                                                                                                                                                                                                                                                                                                                                                                                                                                                                                                                                                                                                                                                                                                                                                                                                                                                                                                                                                                                                                                                                                                                                                                                                                                                                                                                                                                                                                                                                                                                                                                                                                                                                                                                                                                                                                                                                                                                                                                                                                                                                                                                                                                                                                                                                                                                                                                                                                                                                                                                                                                                                                                                                                                                                                                                                                                                                                                                                                                                                                                                                                                                                                                                                                                                                                                                                                                                                                                                                                                                                                                                                                                                                                                                                                                                                                                                                                                                                                                                                                                                                                                                                                                                                                                                                                                                                                                                                                                                                                                                                                                                                                                                                                                                                                                                                                                                                                                                                                                                                                                                                                                                                                                                                                                                                                                                                                                                                                                                                                                                                                                                                                                                                                                                                                                                                                                                                                                                                                                                                                                                                                                                                                                                                                                                                                                                                                                                                                                                                                                                                                                                                                                                                                                                                                                                                                                                                                                                                                                                                                                                                                                                                                                                                                                                                                                                                                                                                                                                                                                                                                        | Department of Respiratory and other Viral Infections of L.V.Gromashevsky<br>Institute of Epidemiology & Infectious Diseases NAMS of Ukraine    | Department of Respiratory and other Viral Infections of L.V.Gromashevsky<br>Institute of Epidemiology & Infectious Diseases NAMS of Ukraine, JSC "Farmak" | Alla Mironenko; Andriy Goy; Ihor Kravchuk; Larysa Radchenko; Liudmyla Bolotova; Natalia Teteriuk                                                                                   |                                                                                                                                                                                                                                                                                                                                                                   |
| see above                                                                                                                                                                                                                                                                                                                                                                                                                                                                                                                                                                                                                                                                                                                                                                                                                                                                                                                                                                                                                                                                                                                                                                                                                                                                                                                                                                                                                                                                                                                                                                                                                                                                                                                                                                                                                                                                                                                                                                                                                                                                                                                                                                                                                                                                                                                                                                                                                                                                                                                                                                                                                                                                                                                                                                                                                                                                                                                                                                                                                                                                                                                                                                                                                                                                                                                                                                                                                                                                                                                                                                                                                                                                                                                                                                                                                                                                                                                                                                                                                                                                                                                                                                                                                                                                                                                                                                                                                                                                                                                                                                                                                                                                                                                                                                                                                                                                                                                                                                                                                                                                                                                                                                                                                                                                                                                                                                                                                                                                                                                                                                                                                                                                                                                                                                                                                                                                                                                                                                                                                                                                                                                                                                                                                                                                                                                                                                                                                                                                                                                                                                                                                                                                                                                                                                                                                                                                                                                                                                                                                                                                                                                                                                                                                                                                                                                                                                                                                                                                                                                                                                                                                                                                                                                                                                                                                                                                                                                                                                                                                                                                                                                                                                                                                                                                                                                                                                                                                                                                                                                                                                                                                                                                                                                                                                                                                                                                                                                                                                                                                                                                                      | Department of Respiratory and other Viral Infections of L.V.Gromashevsky<br>Institute of Epidemiology & Infectious Diseases NAMS of Ukraine    | Department of Respiratory and other Viral Infections of L.V.Gromashevsky<br>Institute of Epidemiology & Infectious Diseases NAMS of Ukraine, JSC "Farmak" | Alla Mironenko; Andriy Goy; Ihor Kravchuk; Larysa Radchenko; Liudmyla Bolotova; Natalia Teteriuk                                                                                   |                                                                                                                                                                                                                                                                                                                                                                   |
| EPI_ISL_654818                                                                                                                                                                                                                                                                                                                                                                                                                                                                                                                                                                                                                                                                                                                                                                                                                                                                                                                                                                                                                                                                                                                                                                                                                                                                                                                                                                                                                                                                                                                                                                                                                                                                                                                                                                                                                                                                                                                                                                                                                                                                                                                                                                                                                                                                                                                                                                                                                                                                                                                                                                                                                                                                                                                                                                                                                                                                                                                                                                                                                                                                                                                                                                                                                                                                                                                                                                                                                                                                                                                                                                                                                                                                                                                                                                                                                                                                                                                                                                                                                                                                                                                                                                                                                                                                                                                                                                                                                                                                                                                                                                                                                                                                                                                                                                                                                                                                                                                                                                                                                                                                                                                                                                                                                                                                                                                                                                                                                                                                                                                                                                                                                                                                                                                                                                                                                                                                                                                                                                                                                                                                                                                                                                                                                                                                                                                                                                                                                                                                                                                                                                                                                                                                                                                                                                                                                                                                                                                                                                                                                                                                                                                                                                                                                                                                                                                                                                                                                                                                                                                                                                                                                                                                                                                                                                                                                                                                                                                                                                                                                                                                                                                                                                                                                                                                                                                                                                                                                                                                                                                                                                                                                                                                                                                                                                                                                                                                                                                                                                                                                                                                                 | Department of Respiratory and other Viral Infections of L.V.Gromashevsky<br>Institute of Epidemiology & Infectious Diseases NAMS of Ukraine    | Department of Respiratory and other Viral Infections of L.V.Gromashevsky<br>Institute of Epidemiology & Infectious Diseases NAMS of Ukraine, JSC "Farmak" | Alla Mironenko; Andriy Goy; Ihor Kravchuk; Larysa Radchenko; Liudmyla Bolotova; Natalia Teteriuk                                                                                   |                                                                                                                                                                                                                                                                                                                                                                   |
| EPI_ISL_3527830, EPI_ISL_5881144                                                                                                                                                                                                                                                                                                                                                                                                                                                                                                                                                                                                                                                                                                                                                                                                                                                                                                                                                                                                                                                                                                                                                                                                                                                                                                                                                                                                                                                                                                                                                                                                                                                                                                                                                                                                                                                                                                                                                                                                                                                                                                                                                                                                                                                                                                                                                                                                                                                                                                                                                                                                                                                                                                                                                                                                                                                                                                                                                                                                                                                                                                                                                                                                                                                                                                                                                                                                                                                                                                                                                                                                                                                                                                                                                                                                                                                                                                                                                                                                                                                                                                                                                                                                                                                                                                                                                                                                                                                                                                                                                                                                                                                                                                                                                                                                                                                                                                                                                                                                                                                                                                                                                                                                                                                                                                                                                                                                                                                                                                                                                                                                                                                                                                                                                                                                                                                                                                                                                                                                                                                                                                                                                                                                                                                                                                                                                                                                                                                                                                                                                                                                                                                                                                                                                                                                                                                                                                                                                                                                                                                                                                                                                                                                                                                                                                                                                                                                                                                                                                                                                                                                                                                                                                                                                                                                                                                                                                                                                                                                                                                                                                                                                                                                                                                                                                                                                                                                                                                                                                                                                                                                                                                                                                                                                                                                                                                                                                                                                                                                                                                               | Diagen                                                                                                                                         | Diagen                                                                                                                                                    | Koliada O; Koliada et al                                                                                                                                                           |                                                                                                                                                                                                                                                                                                                                                                   |
| EPI_ISL_3253254, EPI_ISL_3253255, EPI_ISL_3253256, EPI_ISL_3253257, EPI_ISL_3253258, EPI_ISL_3253259, EPI_ISL_3253260, EPI_ISL_3253261, EPI_ISL_3253262, EPI_ISL_3253263, EPI_ISL_3253264, EPI_ISL_3253265, EPI_ISL_3253266, EPI_ISL_3253267, EPI_ISL_3253268, EPI_ISL_3253269, EPI_ISL_3253270, EPI_ISL_3253271, EPI_ISL_3253272, EPI_ISL_3253273, EPI_ISL_3253274, EPI_ISL_3253275, EPI_ISL_3253276, EPI_ISL_3253277, EPI_ISL_3253278, EPI_ISL_3253279, EPI_ISL_3253280, EPI_ISL_3253282, EPI_ISL_3253283, EPI_ISL_3253284, EPI_ISL_3253285, EPI_ISL_3253286, EPI_ISL_3253287, EPI_ISL_3253288, EPI_ISL_3253289, EPI_ISL_3253290, EPI_ISL_3253291, EPI_ISL_3253292, EPI_ISL_3253293, EPI_ISL_3253294, EPI_ISL_3253295, EPI_ISL_3253296, EPI_ISL_3253297, EPI_ISL_3314947, EPI_ISL_3314948, EPI_ISL_3314949                                                                                                                                                                                                                                                                                                                                                                                                                                                                                                                                                                                                                                                                                                                                                                                                                                                                                                                                                                                                                                                                                                                                                                                                                                                                                                                                                                                                                                                                                                                                                                                                                                                                                                                                                                                                                                                                                                                                                                                                                                                                                                                                                                                                                                                                                                                                                                                                                                                                                                                                                                                                                                                                                                                                                                                                                                                                                                                                                                                                                                                                                                                                                                                                                                                                                                                                                                                                                                                                                                                                                                                                                                                                                                                                                                                                                                                                                                                                                                                                                                                                                                                                                                                                                                                                                                                                                                                                                                                                                                                                                                                                                                                                                                                                                                                                                                                                                                                                                                                                                                                                                                                                                                                                                                                                                                                                                                                                                                                                                                                                                                                                                                                                                                                                                                                                                                                                                                                                                                                                                                                                                                                                                                                                                                                                                                                                                                                                                                                                                                                                                                                                                                                                                                                                                                                                                                                                                                                                                                                                                                                                                                                                                                                                                                                                                                                                                                                                                                                                                                                                                                                                                                                                                                                                                                                                                                                                                                                                                                                                                                                                                                                                                                                                                                                                                   | see above                                                                                                                                      | Dutch COVID-19 response team                                                                                                                              | National Institute for Public Health and the Environment (RIVM)                                                                                                                    | Adam Meijer; AnneMarie van den Brandt; Annelies Kroneman; Bas van der Veer; Chantal Reusken; Dennis Schmitz; Dirk Eggink; Eunice Then; Florian Zwagemaker; Harry Vennema; Jeroen Cremer; Karim Hajji; Kim Freeriks; Lisa Wijsman; Lynn Aarts; Melissa van Tuij; Ryanne Jaarsma; Sanne Bos; Sharon van den Brink; on behalf of the national COVID-19 response team |
| see above                                                                                                                                                                                                                                                                                                                                                                                                                                                                                                                                                                                                                                                                                                                                                                                                                                                                                                                                                                                                                                                                                                                                                                                                                                                                                                                                                                                                                                                                                                                                                                                                                                                                                                                                                                                                                                                                                                                                                                                                                                                                                                                                                                                                                                                                                                                                                                                                                                                                                                                                                                                                                                                                                                                                                                                                                                                                                                                                                                                                                                                                                                                                                                                                                                                                                                                                                                                                                                                                                                                                                                                                                                                                                                                                                                                                                                                                                                                                                                                                                                                                                                                                                                                                                                                                                                                                                                                                                                                                                                                                                                                                                                                                                                                                                                                                                                                                                                                                                                                                                                                                                                                                                                                                                                                                                                                                                                                                                                                                                                                                                                                                                                                                                                                                                                                                                                                                                                                                                                                                                                                                                                                                                                                                                                                                                                                                                                                                                                                                                                                                                                                                                                                                                                                                                                                                                                                                                                                                                                                                                                                                                                                                                                                                                                                                                                                                                                                                                                                                                                                                                                                                                                                                                                                                                                                                                                                                                                                                                                                                                                                                                                                                                                                                                                                                                                                                                                                                                                                                                                                                                                                                                                                                                                                                                                                                                                                                                                                                                                                                                                                                                      |                                                                                                                                                |                                                                                                                                                           |                                                                                                                                                                                    |                                                                                                                                                                                                                                                                                                                                                                   |
| EPI_ISL_1298476, EPI_ISL_1298477,<br>EPI_ISL_1298481                                                                                                                                                                                                                                                                                                                                                                                                                                                                                                                                                                                                                                                                                                                                                                                                                                                                                                                                                                                                                                                                                                                                                                                                                                                                                                                                                                                                                                                                                                                                                                                                                                                                                                                                                                                                                                                                                                                                                                                                                                                                                                                                                                                                                                                                                                                                                                                                                                                                                                                                                                                                                                                                                                                                                                                                                                                                                                                                                                                                                                                                                                                                                                                                                                                                                                                                                                                                                                                                                                                                                                                                                                                                                                                                                                                                                                                                                                                                                                                                                                                                                                                                                                                                                                                                                                                                                                                                                                                                                                                                                                                                                                                                                                                                                                                                                                                                                                                                                                                                                                                                                                                                                                                                                                                                                                                                                                                                                                                                                                                                                                                                                                                                                                                                                                                                                                                                                                                                                                                                                                                                                                                                                                                                                                                                                                                                                                                                                                                                                                                                                                                                                                                                                                                                                                                                                                                                                                                                                                                                                                                                                                                                                                                                                                                                                                                                                                                                                                                                                                                                                                                                                                                                                                                                                                                                                                                                                                                                                                                                                                                                                                                                                                                                                                                                                                                                                                                                                                                                                                                                                                                                                                                                                                                                                                                                                                                                                                                                                                                                                                           | Ivano-Frankivsk CCH#1                                                                                                                          | The Institute of Molecular Biology and Genetics of NASU                                                                                                   | M.Tukalo et al.                                                                                                                                                                    |                                                                                                                                                                                                                                                                                                                                                                   |
| EPI_ISL_1298487<br>EPI_ISL_6359793                                                                                                                                                                                                                                                                                                                                                                                                                                                                                                                                                                                                                                                                                                                                                                                                                                                                                                                                                                                                                                                                                                                                                                                                                                                                                                                                                                                                                                                                                                                                                                                                                                                                                                                                                                                                                                                                                                                                                                                                                                                                                                                                                                                                                                                                                                                                                                                                                                                                                                                                                                                                                                                                                                                                                                                                                                                                                                                                                                                                                                                                                                                                                                                                                                                                                                                                                                                                                                                                                                                                                                                                                                                                                                                                                                                                                                                                                                                                                                                                                                                                                                                                                                                                                                                                                                                                                                                                                                                                                                                                                                                                                                                                                                                                                                                                                                                                                                                                                                                                                                                                                                                                                                                                                                                                                                                                                                                                                                                                                                                                                                                                                                                                                                                                                                                                                                                                                                                                                                                                                                                                                                                                                                                                                                                                                                                                                                                                                                                                                                                                                                                                                                                                                                                                                                                                                                                                                                                                                                                                                                                                                                                                                                                                                                                                                                                                                                                                                                                                                                                                                                                                                                                                                                                                                                                                                                                                                                                                                                                                                                                                                                                                                                                                                                                                                                                                                                                                                                                                                                                                                                                                                                                                                                                                                                                                                                                                                                                                                                                                                                                             | Kalush CRH<br>Klinisch Laboratorium ZNA                                                                                                        | The Institute of Molecular Biology and Genetics of NASU<br>Klinisch Laboratorium ZNA                                                                      | M.Tukalo et al.<br>Verstrepren et al.                                                                                                                                              |                                                                                                                                                                                                                                                                                                                                                                   |
| EPI_ISL_1298475, EPI_ISL_1298478,<br>EPI_ISL_1298479, EPI_ISL_1298485,<br>EPI_ISL_1298486                                                                                                                                                                                                                                                                                                                                                                                                                                                                                                                                                                                                                                                                                                                                                                                                                                                                                                                                                                                                                                                                                                                                                                                                                                                                                                                                                                                                                                                                                                                                                                                                                                                                                                                                                                                                                                                                                                                                                                                                                                                                                                                                                                                                                                                                                                                                                                                                                                                                                                                                                                                                                                                                                                                                                                                                                                                                                                                                                                                                                                                                                                                                                                                                                                                                                                                                                                                                                                                                                                                                                                                                                                                                                                                                                                                                                                                                                                                                                                                                                                                                                                                                                                                                                                                                                                                                                                                                                                                                                                                                                                                                                                                                                                                                                                                                                                                                                                                                                                                                                                                                                                                                                                                                                                                                                                                                                                                                                                                                                                                                                                                                                                                                                                                                                                                                                                                                                                                                                                                                                                                                                                                                                                                                                                                                                                                                                                                                                                                                                                                                                                                                                                                                                                                                                                                                                                                                                                                                                                                                                                                                                                                                                                                                                                                                                                                                                                                                                                                                                                                                                                                                                                                                                                                                                                                                                                                                                                                                                                                                                                                                                                                                                                                                                                                                                                                                                                                                                                                                                                                                                                                                                                                                                                                                                                                                                                                                                                                                                                                                      | Kosov CRH                                                                                                                                      | The Institute of Molecular Biology and Genetics of NASU                                                                                                   | M.Tukalo et al.                                                                                                                                                                    |                                                                                                                                                                                                                                                                                                                                                                   |
| EPI_ISL_5852904, EPI_ISL_5852905, EPI_ISL_5852906, EPI_ISL_5852907, EPI_ISL_5852908, EPI_ISL_5852909, EPI_ISL_5852910, EPI_ISL_5852911, EPI_ISL_5852912, EPI_ISL_5852913, EPI_ISL_5852914, EPI_ISL_5852915, EPI_ISL_5852916, EPI_ISL_5852917, EPI_ISL_5852918, EPI_ISL_5852919, EPI_ISL_5852920, EPI_ISL_5852921, EPI_ISL_5852922, EPI_ISL_5852923, EPI_ISL_5852924, EPI_ISL_5852925, EPI_ISL_5852926, EPI_ISL_5859548                                                                                                                                                                                                                                                                                                                                                                                                                                                                                                                                                                                                                                                                                                                                                                                                                                                                                                                                                                                                                                                                                                                                                                                                                                                                                                                                                                                                                                                                                                                                                                                                                                                                                                                                                                                                                                                                                                                                                                                                                                                                                                                                                                                                                                                                                                                                                                                                                                                                                                                                                                                                                                                                                                                                                                                                                                                                                                                                                                                                                                                                                                                                                                                                                                                                                                                                                                                                                                                                                                                                                                                                                                                                                                                                                                                                                                                                                                                                                                                                                                                                                                                                                                                                                                                                                                                                                                                                                                                                                                                                                                                                                                                                                                                                                                                                                                                                                                                                                                                                                                                                                                                                                                                                                                                                                                                                                                                                                                                                                                                                                                                                                                                                                                                                                                                                                                                                                                                                                                                                                                                                                                                                                                                                                                                                                                                                                                                                                                                                                                                                                                                                                                                                                                                                                                                                                                                                                                                                                                                                                                                                                                                                                                                                                                                                                                                                                                                                                                                                                                                                                                                                                                                                                                                                                                                                                                                                                                                                                                                                                                                                                                                                                                                                                                                                                                                                                                                                                                                                                                                                                                                                                                                                         | see above                                                                                                                                      | L.V. Gromashevsky Institute of Epidemiology and Infectious Diseases of the<br>NAMS of Ukraine                                                             | L.V. Gromashevsky Institute of Epidemiology and Infectious Diseases of the NAMS<br>of Ukraine                                                                                      | Alla M. Scherbinska; Anna Yakovleva; Eric Bortz; Ganna Kovalenko; Ian Goodfellow; Joel O. Wertheim; Luke Meredith; Maria G. Liulchuk; Matthew Redlinger; Tetyana I. Vasylevka; Viktoria I. Zadorozhna                                                                                                                                                             |
| EPI_ISL_1298480, EPI_ISL_1298484                                                                                                                                                                                                                                                                                                                                                                                                                                                                                                                                                                                                                                                                                                                                                                                                                                                                                                                                                                                                                                                                                                                                                                                                                                                                                                                                                                                                                                                                                                                                                                                                                                                                                                                                                                                                                                                                                                                                                                                                                                                                                                                                                                                                                                                                                                                                                                                                                                                                                                                                                                                                                                                                                                                                                                                                                                                                                                                                                                                                                                                                                                                                                                                                                                                                                                                                                                                                                                                                                                                                                                                                                                                                                                                                                                                                                                                                                                                                                                                                                                                                                                                                                                                                                                                                                                                                                                                                                                                                                                                                                                                                                                                                                                                                                                                                                                                                                                                                                                                                                                                                                                                                                                                                                                                                                                                                                                                                                                                                                                                                                                                                                                                                                                                                                                                                                                                                                                                                                                                                                                                                                                                                                                                                                                                                                                                                                                                                                                                                                                                                                                                                                                                                                                                                                                                                                                                                                                                                                                                                                                                                                                                                                                                                                                                                                                                                                                                                                                                                                                                                                                                                                                                                                                                                                                                                                                                                                                                                                                                                                                                                                                                                                                                                                                                                                                                                                                                                                                                                                                                                                                                                                                                                                                                                                                                                                                                                                                                                                                                                                                                               | Nadvirna CRH                                                                                                                                   | The Institute of Molecular Biology and Genetics of NASU                                                                                                   | M.Tukalo et al.                                                                                                                                                                    |                                                                                                                                                                                                                                                                                                                                                                   |
| EPI_ISL_512597, EPI_ISL_512598, EPI_ISL_512599, EPI_ISL_512600, EPI_ISL_512601, EPI_ISL_512602, EPI_ISL_512603, EPI_ISL_512604, EPI_ISL_512605, EPI_ISL_512606, EPI_ISL_512607, EPI_ISL_512608, EPI_ISL_512609, EPI_ISL_512610, EPI_ISL_512611, EPI_ISL_512612, EPI_ISL_512613, EPI_ISL_512614, EPI_ISL_512615, EPI_ISL_512616, EPI_ISL_512617, EPI_ISL_512618, EPI_ISL_512619, EPI_ISL_512620, EPI_ISL_512621, EPI_ISL_512622, EPI_ISL_512623, EPI_ISL_512624, EPI_ISL_512625, EPI_ISL_512626, EPI_ISL_512627, EPI_ISL_512628, EPI_ISL_512629, EPI_ISL_512630, EPI_ISL_512631, EPI_ISL_512632, EPI_ISL_512633, EPI_ISL_512634, EPI_ISL_512635, EPI_ISL_512636, EPI_ISL_512637, EPI_ISL_512639, EPI_ISL_512640, EPI_ISL_512641, EPI_ISL_512642, EPI_ISL_512643, EPI_ISL_512644, EPI_ISL_512645, EPI_ISL_512646, EPI_ISL_512647, EPI_ISL_512648, EPI_ISL_512649, EPI_ISL_512650, EPI_ISL_512651, EPI_ISL_512652, EPI_ISL_512653, EPI_ISL_512654, EPI_ISL_512655, EPI_ISL_512656, EPI_ISL_512657, EPI_ISL_512658, EPI_ISL_512659, EPI_ISL_512660, EPI_ISL_512661, EPI_ISL_512662, EPI_ISL_512663, EPI_ISL_512664, EPI_ISL_512665, EPI_ISL_512666, EPI_ISL_512667, EPI_ISL_512668, EPI_ISL_512669, EPI_ISL_512670, EPI_ISL_512671, EPI_ISL_512672, EPI_ISL_512673, EPI_ISL_512674, EPI_ISL_512675, EPI_ISL_512676, EPI_ISL_512677, EPI_ISL_512678, EPI_ISL_512679, EPI_ISL_512680, EPI_ISL_512681, EPI_ISL_512682, EPI_ISL_512683, EPI_ISL_512684, EPI_ISL_512685, EPI_ISL_512686, EPI_ISL_512687, EPI_ISL_512688, EPI_ISL_512689, EPI_ISL_512690, EPI_ISL_512691, EPI_ISL_512692, EPI_ISL_512693, EPI_ISL_512694, EPI_ISL_512695, EPI_ISL_512696, EPI_ISL_512697, EPI_ISL_512698, EPI_ISL_512699, EPI_ISL_512700, EPI_ISL_512701, EPI_ISL_512702, EPI_ISL_512703, EPI_ISL_512704, EPI_ISL_512705, EPI_ISL_512706, EPI_ISL_512707, EPI_ISL_512708, EPI_ISL_512709, EPI_ISL_512710, EPI_ISL_512711, EPI_ISL_512712, EPI_ISL_512713, EPI_ISL_512714, EPI_ISL_512715, EPI_ISL_512716, EPI_ISL_512717, EPI_ISL_512718, EPI_ISL_512719, EPI_ISL_512720, EPI_ISL_512721, EPI_ISL_512722, EPI_ISL_512723, EPI_ISL_512724, EPI_ISL_512725, EPI_ISL_512726, EPI_ISL_512727, EPI_ISL_512728, EPI_ISL_512729, EPI_ISL_512730, EPI_ISL_512731, EPI_ISL_512732, EPI_ISL_512733, EPI_ISL_512734, EPI_ISL_512735, EPI_ISL_512736, EPI_ISL_512737, EPI_ISL_512738, EPI_ISL_512739, EPI_ISL_512740, EPI_ISL_512741, EPI_ISL_512742, EPI_ISL_512743, EPI_ISL_512744, EPI_ISL_512745, EPI_ISL_512746, EPI_ISL_512747, EPI_ISL_512748, EPI_ISL_512749, EPI_ISL_512750, EPI_ISL_512751, EPI_ISL_512752, EPI_ISL_512753, EPI_ISL_512754, EPI_ISL_512755, EPI_ISL_512756, EPI_ISL_512757, EPI_ISL_512758, EPI_ISL_512759, EPI_ISL_512760, EPI_ISL_512761, EPI_ISL_512762, EPI_ISL_512763, EPI_ISL_512764, EPI_ISL_512765, EPI_ISL_512766, EPI_ISL_512767, EPI_ISL_512768, EPI_ISL_512769, EPI_ISL_512770, EPI_ISL_512771, EPI_ISL_512772, EPI_ISL_512773, EPI_ISL_512774, EPI_ISL_512775, EPI_ISL_512776, EPI_ISL_512777, EPI_ISL_512778, EPI_ISL_512779, EPI_ISL_512780, EPI_ISL_512781, EPI_ISL_512782, EPI_ISL_512783, EPI_ISL_512784, EPI_ISL_512785, EPI_ISL_512786, EPI_ISL_512787, EPI_ISL_512788, EPI_ISL_512789, EPI_ISL_512790, EPI_ISL_512791, EPI_ISL_512792, EPI_ISL_512793, EPI_ISL_512794, EPI_ISL_512795, EPI_ISL_512796, EPI_ISL_512797, EPI_ISL_512798, EPI_ISL_512799, EPI_ISL_512800, EPI_ISL_512801, EPI_ISL_512802, EPI_ISL_512803, EPI_ISL_512804, EPI_ISL_512805, EPI_ISL_512806, EPI_ISL_512807, EPI_ISL_512808, EPI_ISL_512809, EPI_ISL_512810, EPI_ISL_512811, EPI_ISL_512812, EPI_ISL_512813, EPI_ISL_512814, EPI_ISL_512815, EPI_ISL_512816, EPI_ISL_512817, EPI_ISL_512818, EPI_ISL_512819, EPI_ISL_512820, EPI_ISL_512821, EPI_ISL_512822, EPI_ISL_512823, EPI_ISL_512824, EPI_ISL_512825, EPI_ISL_512826, EPI_ISL_512827, EPI_ISL_512828, EPI_ISL_512829, EPI_ISL_512830, EPI_ISL_512831, EPI_ISL_512832, EPI_ISL_512833, EPI_ISL_512834, EPI_ISL_512835, EPI_ISL_512836, EPI_ISL_512837, EPI_ISL_512838, EPI_ISL_512839, EPI_ISL_512840, EPI_ISL_512841, EPI_ISL_512842, EPI_ISL_512843, EPI_ISL_512844, EPI_ISL_512845, EPI_ISL_512846, EPI_ISL_512847, EPI_ISL_512848, EPI_ISL_512849, EPI_ISL_512850, EPI_ISL_512851, EPI_ISL_512852, EPI_ISL_512853, EPI_ISL_512854, EPI_ISL_512855, EPI_ISL_512856, EPI_ISL_512857, EPI_ISL_512858, EPI_ISL_512859, EPI_ISL_512860, EPI_ISL_512861, EPI_ISL_512862, EPI_ISL_512863, EPI_ISL_512864, EPI_ISL_512865, EPI_ISL_512866, EPI_ISL_512867, EPI_ISL_512868, EPI_ISL_512869, EPI_ISL_512870, EPI_ISL_512871, EPI_ISL_512872, EPI_ISL_512873, EPI_ISL_512874, EPI_ISL_512875, EPI_ISL_512876, EPI_ISL_512877, EPI_ISL_512878, EPI_ISL_512879, EPI_ISL_512880, EPI_ISL_512881, EPI_ISL_512882, EPI_ISL_512883, EPI_ISL_512884, EPI_ISL_512885, EPI_ISL_512886, EPI_ISL_512887, EPI_ISL_512888, EPI_ISL_512889, EPI_ISL_512890, EPI_ISL_512891, EPI_ISL_512892, EPI_ISL_512893, EPI_ISL_512894, EPI_ISL_512895, EPI_ISL_512896, EPI_ISL_512897, EPI_ISL_512898, EPI_ISL_512899, EPI_ISL_512900, EPI_ISL_512901, EPI_ISL_512902, EPI_ISL_512903, EPI_ISL_512904, EPI_ISL_512905, EPI_ISL_512906, EPI_ISL_512907, EPI_ISL_512908, EPI_ISL_512909, EPI_ISL_512910, EPI_ISL_512911, EPI_ISL_512912, EPI_ISL_512913, EPI_ISL_512914, EPI_ISL_512915, EPI_ISL_512916, EPI_ISL_512917, EPI_ISL_512918, EPI_ISL_512919, EPI_ISL_512920, EPI_ISL_512921, EPI_ISL_512922, EPI_ISL_512923, EPI_ISL_512924, EPI_ISL_512925, EPI_ISL_512926, EPI_ISL_512927, EPI_ISL_512928, EPI_ISL_512929, EPI_ISL_512930, EPI_ISL_512931, EPI_ISL_512932, EPI_ISL_512933, EPI_ISL_512934, EPI_ISL_512935, EPI_ISL_512936, EPI_ISL_512937, EPI_ISL_512938, EPI_ISL_512939, EPI_ISL_512940, EPI_ISL_512941, EPI_ISL_512942, EPI_ISL_512943, EPI_ISL_512944, EPI_ISL_512945, EPI_ISL_512946, EPI_ISL_512947, EPI_ISL_512948, EPI_ISL_512949, EPI_ISL_512950, EPI_ISL_512951, EPI_ISL_512952, EPI_ISL_512953, EPI_ISL_512954, EPI_ISL_512955, EPI_ISL_512956, EPI_ISL_512957, EPI_ISL_512958, EPI_ISL_512959, EPI_ISL_512960, EPI_ISL_512961, EPI_ISL_512962, EPI_ISL_512963, EPI_ISL_512964, EPI_ISL_512965, EPI_ISL_512966, EPI_ISL_512967, EPI_ISL_512968, EPI_ISL_512969, EPI_ISL_512970, EPI_ISL_512971, EPI_ISL_512972, EPI_ISL_512973, EPI_ISL_512974, EPI_ISL_512975, EPI_ISL_512976, EPI_ISL_512977, EPI_ISL_512978, EPI_ISL_512979, EPI_ISL_512980, EPI_ISL_512981, EPI_ISL_512982, EPI_ISL_512983, EPI_ISL_512984, EPI_ISL_512985, EPI_ISL_512986, EPI_ISL_512987, EPI_ISL_512988, EPI_ISL_512989, EPI_ISL_512990, EPI_ISL_512991, EPI_ISL_512992, EPI_ISL_512993, EPI_ISL_512994, EPI_ISL_512995, EPI_ISL_512996, EPI_ISL_512997, EPI_ISL_512998, EPI_ISL_512999, EPI_ISL_513000, EPI_ISL_513001, EPI_ISL_513002, EPI_ISL_513003, EPI_ISL_513004, EPI_ISL_513005, EPI_ISL_513006, EPI_ISL_513007, EPI_ISL_513008, EPI_ISL_513009, EPI_ISL_513010, EPI_ISL_513011, EPI_ISL_513012, EPI_ISL_513013, EPI_ISL_513014, EPI_ISL_513015, EPI_ISL_513016, EPI_ISL_513017, EPI_ISL_513018, EPI_ISL_513019, EPI_ISL_513020, EPI_ISL_513021, EPI_ISL_513022, EPI_ISL_513023, EPI_ISL_513024, EPI_ISL_513025, EPI_ISL_513026, EPI_ISL_513027, EPI_ISL_513028, EPI_ISL_513029, EPI_ISL_513030, EPI_ISL_513031, EPI_ISL_513032, EPI_ISL_513033, EPI_ISL_513034, EPI_ISL_513035, EPI_ISL_513036, EPI_ISL_513037, EPI_ISL_513038, EPI_ISL_513039, EPI_ISL_513040, EPI_ISL_513041, EPI_ISL_513042, EPI_ISL_513043, EPI_ISL_513044, EPI_ISL_513045, EPI_ISL_513046, EPI_ISL_513047, EPI_ISL_513048, EPI_ISL_513049, EPI_ISL_513050, EPI_ISL_513051, EPI_ISL_513052, EPI_ISL_513053, EPI_ISL_513054, EPI_ISL_513055, EPI_ISL_513056, EPI_ISL_513057, EPI_ISL_513058, EPI_ISL_513059, EPI_ISL_513060, EPI_ISL_513061, EPI_ISL_513062, EPI_ISL_513063, EPI_ISL_513064, EPI_ISL_513065, EPI_ISL_513066, EPI_ISL_513067, EPI_ISL_513068, EPI_ISL_513069, EPI_ISL_513070, EPI_ISL_513071, EPI_ISL_513072, EPI_ISL_513073, EPI_ISL_513074, EPI_ISL_513075, EPI_ISL_513076, EPI_ISL_513077, EPI_ISL_513078, EPI_ISL_513079, EPI_ISL_513080, EPI_ISL_513081, EPI_ISL_513082, EPI_ISL_513083, EPI_ISL_513084, EPI_ISL_513085, EPI_ISL_513086, EPI_ISL_513087, EPI_ISL_513088, EPI_ISL_513089, EPI_ISL_513090, EPI_ISL_513091, EPI_ISL_513092, EPI_ISL_513093, EPI_ISL_513094, EPI_ISL_513095, EPI_ISL_513096, EPI_ISL_513097, EPI_ISL_513098, EPI_ISL_513099, EPI_ISL_513100, EPI_ISL_513101, EPI_ISL_513102, EPI_ISL_513103, EPI_ISL_513104, EPI_ISL_513105, EPI_ISL_513106, EPI_ISL_513107, EPI_ISL_513108, EPI_ISL_513109, EPI_ISL_513110, EPI_ISL_513111, EPI_ISL_513112, EPI_ISL_513113, EPI_ISL_513114, EPI_ISL_513115, EPI_ISL_513116, EPI_ISL_513117, EPI_ISL_513118, EPI_ISL_513119, EPI_ISL_513120, EPI_ISL_513121, EPI_ISL_513122, EPI_ISL_513123, EPI_ISL_513124, EPI_ISL_513125, EPI_ISL_513126, EPI_ISL_513127, EPI_ISL_513128, EPI_ISL_513129, EPI_ISL_513130, EPI_ISL_513131, EPI_ISL_513132, EPI_ISL_513133, EPI_ISL_513134, EPI_ISL_513135, EPI_ISL_513136, EPI_ISL_513137, EPI_ISL_513138, EPI_ISL_513139, EPI_ISL_513140, EPI_ISL_513141, EPI_ISL_513142, EPI_ISL_513143 | see above                                                                                                                                      | National Laboratory for Influenza/Virology reference laboratory, Public<br>Health Center of the Ministry of Health of Ukraine                             | Respiratory Virus Unit, Microbiology Services Colindale, Public Health England                                                                                                     | Dr. Iryna Demchyshyna; PHE Covid Sequencing Team                                                                                                                                                                                                                                                                                                                  |
| EPI_ISL_4440036, EPI_ISL_4440039, EPI_ISL_4440042, EPI_ISL_4440044, EPI_ISL_4440046, EPI_ISL_4440048, EPI_ISL_4440053, EPI_ISL_4440055, EPI_ISL_4440057, EPI_ISL_4440060, EPI_ISL_4440062, EPI_ISL_4440064, EPI_ISL_4440066, EPI_ISL_4440068, EPI_ISL_4440071, EPI_ISL_4440073, EPI_ISL_4440075, EPI_ISL_4440078, EPI_ISL_4440080, EPI_ISL_4440082, EPI_ISL_4440084, EPI_ISL_4440087, EPI_ISL_4440089, EPI_ISL_4440092, EPI_ISL_4440093, EPI_ISL_4440095, EPI_ISL_4440097, EPI_ISL_4440099, EPI_ISL_4440101, EPI_ISL_4440103                                                                                                                                                                                                                                                                                                                                                                                                                                                                                                                                                                                                                                                                                                                                                                                                                                                                                                                                                                                                                                                                                                                                                                                                                                                                                                                                                                                                                                                                                                                                                                                                                                                                                                                                                                                                                                                                                                                                                                                                                                                                                                                                                                                                                                                                                                                                                                                                                                                                                                                                                                                                                                                                                                                                                                                                                                                                                                                                                                                                                                                                                                                                                                                                                                                                                                                                                                                                                                                                                                                                                                                                                                                                                                                                                                                                                                                                                                                                                                                                                                                                                                                                                                                                                                                                                                                                                                                                                                                                                                                                                                                                                                                                                                                                                                                                                                                                                                                                                                                                                                                                                                                                                                                                                                                                                                                                                                                                                                                                                                                                                                                                                                                                                                                                                                                                                                                                                                                                                                                                                                                                                                                                                                                                                                                                                                                                                                                                                                                                                                                                                                                                                                                                                                                                                                                                                                                                                                                                                                                                                                                                                                                                                                                                                                                                                                                                                                                                                                                                                                                                                                                                                                                                                                                                                                                                                                                                                                                                                                                                                                                                                                                                                                                                                                                                                                                                                                                                                                                                                                                                                                   | see above                                                                                                                                      | Public Health Center of MHU                                                                                                                               | The Institute of Molecular Biology and Genetics of NASU                                                                                                                            | M.Tukalo et al.                                                                                                                                                                                                                                                                                                                                                   |
| EPI_ISL_1112293, EPI_ISL_1112294, EPI_ISL_1112295, EPI_ISL_1112296, EPI_ISL_1112297, EPI_ISL_1112298, EPI_ISL_1112299, EPI_ISL_1112300, EPI_ISL_1112301, EPI_ISL_1112302, EPI_ISL_1112303, EPI_ISL_1112304, EPI_ISL_1112305, EPI_ISL_1112306, EPI_ISL_1112307, EPI_ISL_1112308, EPI_ISL_1112309, EPI_ISL_1112310, EPI_ISL_1112311, EPI_ISL_1112312, EPI_ISL_1112313, EPI_ISL_1112314, EPI_ISL_1112315, EPI_ISL_1112316, EPI_ISL_1112317, EPI_ISL_1112318, EPI_ISL_1112319, EPI_ISL_1112320, EPI_ISL_1112321, EPI_ISL_1112322, EPI_ISL_1112323, EPI_ISL_1112324, EPI_ISL_1112325, EPI_ISL_1112326, EPI_ISL_1112327, EPI_ISL_1112328, EPI_ISL_1112329, EPI_ISL_1112330, EPI_ISL_1112331, EPI_ISL_1112332, EPI_ISL_1112333, EPI_ISL_1112334, EPI_ISL_1112335, EPI_ISL_1112336, EPI_ISL_1112337, EPI_ISL_1112338, EPI_ISL_1112339, EPI_ISL_1112340                                                                                                                                                                                                                                                                                                                                                                                                                                                                                                                                                                                                                                                                                                                                                                                                                                                                                                                                                                                                                                                                                                                                                                                                                                                                                                                                                                                                                                                                                                                                                                                                                                                                                                                                                                                                                                                                                                                                                                                                                                                                                                                                                                                                                                                                                                                                                                                                                                                                                                                                                                                                                                                                                                                                                                                                                                                                                                                                                                                                                                                                                                                                                                                                                                                                                                                                                                                                                                                                                                                                                                                                                                                                                                                                                                                                                                                                                                                                                                                                                                                                                                                                                                                                                                                                                                                                                                                                                                                                                                                                                                                                                                                                                                                                                                                                                                                                                                                                                                                                                                                                                                                                                                                                                                                                                                                                                                                                                                                                                                                                                                                                                                                                                                                                                                                                                                                                                                                                                                                                                                                                                                                                                                                                                                                                                                                                                                                                                                                                                                                                                                                                                                                                                                                                                                                                                                                                                                                                                                                                                                                                                                                                                                                                                                                                                                                                                                                                                                                                                                                                                                                                                                                                                                                                                                                                                                                                                                                                                                                                                                                                                                                                                                                                                                                 | see above                                                                                                                                      | Public Health Center of Ukraine                                                                                                                           | Charité Universitätsmedizin Berlin, Institute of Virology                                                                                                                          | Barbara Mühlemann; Christian Drosten; Ihor Kuzin; Iryna Demchyshyna; Julia Schneider; Jörn Beheim-Schwarzbach; Liudmyla Chernenko; Roman Rodyna; Talitha Veith; Terry Jones; Victor M Corman                                                                                                                                                                      |
| EPI_ISL_2934571, EPI_ISL_2934572,<br>EPI_ISL_2934575, EPI_ISL_2966511,<br>EPI_ISL_2966513                                                                                                                                                                                                                                                                                                                                                                                                                                                                                                                                                                                                                                                                                                                                                                                                                                                                                                                                                                                                                                                                                                                                                                                                                                                                                                                                                                                                                                                                                                                                                                                                                                                                                                                                                                                                                                                                                                                                                                                                                                                                                                                                                                                                                                                                                                                                                                                                                                                                                                                                                                                                                                                                                                                                                                                                                                                                                                                                                                                                                                                                                                                                                                                                                                                                                                                                                                                                                                                                                                                                                                                                                                                                                                                                                                                                                                                                                                                                                                                                                                                                                                                                                                                                                                                                                                                                                                                                                                                                                                                                                                                                                                                                                                                                                                                                                                                                                                                                                                                                                                                                                                                                                                                                                                                                                                                                                                                                                                                                                                                                                                                                                                                                                                                                                                                                                                                                                                                                                                                                                                                                                                                                                                                                                                                                                                                                                                                                                                                                                                                                                                                                                                                                                                                                                                                                                                                                                                                                                                                                                                                                                                                                                                                                                                                                                                                                                                                                                                                                                                                                                                                                                                                                                                                                                                                                                                                                                                                                                                                                                                                                                                                                                                                                                                                                                                                                                                                                                                                                                                                                                                                                                                                                                                                                                                                                                                                                                                                                                                                                      | SE Kyiv CDC MHU                                                                                                                                | The Institute of Molecular Biology and Genetics of NASU                                                                                                   | M.Tukalo et al.                                                                                                                                                                    |                                                                                                                                                                                                                                                                                                                                                                   |
| EPI_ISL_2934569, EPI_ISL_2934570,<br>EPI_ISL_2934573, EPI_ISL_2934574,<br>EPI_ISL_2966512                                                                                                                                                                                                                                                                                                                                                                                                                                                                                                                                                                                                                                                                                                                                                                                                                                                                                                                                                                                                                                                                                                                                                                                                                                                                                                                                                                                                                                                                                                                                                                                                                                                                                                                                                                                                                                                                                                                                                                                                                                                                                                                                                                                                                                                                                                                                                                                                                                                                                                                                                                                                                                                                                                                                                                                                                                                                                                                                                                                                                                                                                                                                                                                                                                                                                                                                                                                                                                                                                                                                                                                                                                                                                                                                                                                                                                                                                                                                                                                                                                                                                                                                                                                                                                                                                                                                                                                                                                                                                                                                                                                                                                                                                                                                                                                                                                                                                                                                                                                                                                                                                                                                                                                                                                                                                                                                                                                                                                                                                                                                                                                                                                                                                                                                                                                                                                                                                                                                                                                                                                                                                                                                                                                                                                                                                                                                                                                                                                                                                                                                                                                                                                                                                                                                                                                                                                                                                                                                                                                                                                                                                                                                                                                                                                                                                                                                                                                                                                                                                                                                                                                                                                                                                                                                                                                                                                                                                                                                                                                                                                                                                                                                                                                                                                                                                                                                                                                                                                                                                                                                                                                                                                                                                                                                                                                                                                                                                                                                                                                                      | SECP MHU                                                                                                                                       | The Institute of Molecular Biology and Genetics of NASU                                                                                                   | M.Tukalo et al.                                                                                                                                                                    |                                                                                                                                                                                                                                                                                                                                                                   |
| EPI_ISL_3262118, EPI_ISL_3262119, EPI_ISL_3262120, EPI_ISL_3262121, EPI_ISL_3262122, EPI_ISL_3262123, EPI_ISL_3262124, EPI_ISL_3262125, EPI_ISL_3262126, EPI_ISL_3262127, EPI_ISL_3262128, EPI_ISL_3262129, EPI_ISL_3262130, EPI_ISL_3262131, EPI_ISL_3262132, EPI_ISL_3262133, EPI_ISL_3262134, EPI_ISL_3262135, EPI_ISL_3262136, EPI_ISL_3262137, EPI_ISL_3262138, EPI_ISL_3262139, EPI_ISL_3262140, EPI_ISL_3262141, EPI_ISL_3262142, EPI_ISL_3262143, EPI_ISL_3262144, EPI_ISL_3262145, EPI_ISL_3262146, EPI_ISL_3262147, EPI_ISL_3262148, EPI                                                                                                                                                                                                                                                                                                                                                                                                                                                                                                                                                                                                                                                                                                                                                                                                                                                                                                                                                                                                                                                                                                                                                                                                                                                                                                                                                                                                                                                                                                                                                                                                                                                                                                                                                                                                                                                                                                                                                                                                                                                                                                                                                                                                                                                                                                                                                                                                                                                                                                                                                                                                                                                                                                                                                                                                                                                                                                                                                                                                                                                                                                                                                                                                                                                                                                                                                                                                                                                                                                                                                                                                                                                                                                                                                                                                                                                                                                                                                                                                                                                                                                                                                                                                                                                                                                                                                                                                                                                                                                                                                                                                                                                                                                                                                                                                                                                                                                                                                                                                                                                                                                                                                                                                                                                                                                                                                                                                                                                                                                                                                                                                                                                                                                                                                                                                                                                                                                                                                                                                                                                                                                                                                                                                                                                                                                                                                                                                                                                                                                                                                                                                                                                                                                                                                                                                                                                                                                                                                                                                                                                                                                                                                                                                                                                                                                                                                                                                                                                                                                                                                                                                                                                                                                                                                                                                                                                                                                                                                                                                                                                                                                                                                                                                                                                                                                                                                                                                                                                                                                                                             |                                                                                                                                                |                                                                                                                                                           |                                                                                                                                                                                    |                                                                                                                                                                                                                                                                                                                                                                   |

We gratefully acknowledge the following Authors from the Originating laboratories responsible for obtaining the specimens, as well as the Submitting laboratories where the genome data were generated and shared via GISAID, on which this research is based.

All Submitters of data may be contacted directly via [www.gisaid.org](http://www.gisaid.org)

| Accession ID                                                                                                                                                                                                                                                                                                                                                                                                                                                                                                                                                                                                                                                                                                                                                                                                                                                                                                                                                                                                                                                                                                                                                                                                                                                                                                                                                                                                                                                                                                                                                                                                                                                                                                                                                                                                                                                                                                                                                                                                                                                                                                                                                                                                                                                                                                                                                                                                                                                                                                                                                                                                                                                                                                                                                                                                                                                                                                                                                                                                                                                                                                                                                                                                                                                                                                                                                                                                                                                                                                                                                                                                                                                                                                                                                                                                                                                                                                                                                                                                                                                                                                                                                                                                                                                                                                                                                                                                                                                                                                                                                                                                                                                                                                                                                                                                   | Originating Laboratory                                                                                                                                       | Submitting Laboratory                                                                                                                                                                                     | Authors                                                                                                                                                                                                                                                                                                                                                                                                         |
|----------------------------------------------------------------------------------------------------------------------------------------------------------------------------------------------------------------------------------------------------------------------------------------------------------------------------------------------------------------------------------------------------------------------------------------------------------------------------------------------------------------------------------------------------------------------------------------------------------------------------------------------------------------------------------------------------------------------------------------------------------------------------------------------------------------------------------------------------------------------------------------------------------------------------------------------------------------------------------------------------------------------------------------------------------------------------------------------------------------------------------------------------------------------------------------------------------------------------------------------------------------------------------------------------------------------------------------------------------------------------------------------------------------------------------------------------------------------------------------------------------------------------------------------------------------------------------------------------------------------------------------------------------------------------------------------------------------------------------------------------------------------------------------------------------------------------------------------------------------------------------------------------------------------------------------------------------------------------------------------------------------------------------------------------------------------------------------------------------------------------------------------------------------------------------------------------------------------------------------------------------------------------------------------------------------------------------------------------------------------------------------------------------------------------------------------------------------------------------------------------------------------------------------------------------------------------------------------------------------------------------------------------------------------------------------------------------------------------------------------------------------------------------------------------------------------------------------------------------------------------------------------------------------------------------------------------------------------------------------------------------------------------------------------------------------------------------------------------------------------------------------------------------------------------------------------------------------------------------------------------------------------------------------------------------------------------------------------------------------------------------------------------------------------------------------------------------------------------------------------------------------------------------------------------------------------------------------------------------------------------------------------------------------------------------------------------------------------------------------------------------------------------------------------------------------------------------------------------------------------------------------------------------------------------------------------------------------------------------------------------------------------------------------------------------------------------------------------------------------------------------------------------------------------------------------------------------------------------------------------------------------------------------------------------------------------------------------------------------------------------------------------------------------------------------------------------------------------------------------------------------------------------------------------------------------------------------------------------------------------------------------------------------------------------------------------------------------------------------------------------------------------------------------------------------------|--------------------------------------------------------------------------------------------------------------------------------------------------------------|-----------------------------------------------------------------------------------------------------------------------------------------------------------------------------------------------------------|-----------------------------------------------------------------------------------------------------------------------------------------------------------------------------------------------------------------------------------------------------------------------------------------------------------------------------------------------------------------------------------------------------------------|
| EPI_ISL_7398746<br>EPI_ISL_8917339<br>EPI_ISL_8142634<br>EPI_ISL_9663029, EPI_ISL_9663030,<br>EPI_ISL_9663031, EPI_ISL_9663032                                                                                                                                                                                                                                                                                                                                                                                                                                                                                                                                                                                                                                                                                                                                                                                                                                                                                                                                                                                                                                                                                                                                                                                                                                                                                                                                                                                                                                                                                                                                                                                                                                                                                                                                                                                                                                                                                                                                                                                                                                                                                                                                                                                                                                                                                                                                                                                                                                                                                                                                                                                                                                                                                                                                                                                                                                                                                                                                                                                                                                                                                                                                                                                                                                                                                                                                                                                                                                                                                                                                                                                                                                                                                                                                                                                                                                                                                                                                                                                                                                                                                                                                                                                                                                                                                                                                                                                                                                                                                                                                                                                                                                                                                 | "Dila" medical laboratory<br>2021-12-04<br>AZ St-Jan Brugge-Oostende<br>Center for Family Medicine of Ukrainian Medical Diagnostic Center                    | "Dila" medical laboratory<br>Jiaxing Center for Disease Control and Prevention<br>AZ St-Jan Brugge-Oostende<br>L.V. Gromashevsky Institute of Epidemiology and Infectious Diseases of the NAMS of Ukraine | Kostiantyn Nekrasov<br>Guoying Zhu; Ping Li; Shencong Lv; Yin Song; Yong Yan; Zhongwen Chen<br>Jorn Hellemans; Marie Madeleine Chabert-Consen; Marijke Reynders; Patrick Descheemaeker; Sofie Mahboob<br>Alla M. Scherbinska; Anna Yakovleva; Eric Bortz; Ganna Kovalenko; Ian Goodfellow; Joel O. Wertheim; Luke Meredith; Mariia G. Liulchuk; Matthew Redlinger; Tetyana I. Vasylyeva; Viktoria I. Zadorozhna |
| EPI_ISL_12436296, EPI_ISL_12436297, EPI_ISL_12436298, EPI_ISL_12436299, EPI_ISL_12436300, EPI_ISL_12436322, EPI_ISL_12436324, EPI_ISL_12436325, EPI_ISL_12546574, EPI_ISL_12546614, EPI_ISL_12546615, EPI_ISL_12546616, EPI_ISL_12546617, EPI_ISL_12546618, EPI_ISL_12546619, EPI_ISL_12546632                                                                                                                                                                                                                                                                                                                                                                                                                                                                                                                                                                                                                                                                                                                                                                                                                                                                                                                                                                                                                                                                                                                                                                                                                                                                                                                                                                                                                                                                                                                                                                                                                                                                                                                                                                                                                                                                                                                                                                                                                                                                                                                                                                                                                                                                                                                                                                                                                                                                                                                                                                                                                                                                                                                                                                                                                                                                                                                                                                                                                                                                                                                                                                                                                                                                                                                                                                                                                                                                                                                                                                                                                                                                                                                                                                                                                                                                                                                                                                                                                                                                                                                                                                                                                                                                                                                                                                                                                                                                                                                 | see above<br>Department of Respiratory and other Viral Infections of L.V. Gromashevsky Institute of Epidemiology & Infectious Diseases NAMS of Ukraine       | Department of Respiratory and other Viral Infections of L.V. Gromashevsky Institute of Epidemiology & Infectious Diseases NAMS of Ukraine, JSC Farmak                                                     | Alla Mironenko; Andriy Goy; Ihor Kravchuk; Larysa Radchenko; Nataliia Teteriuk; Pydiura Mykola                                                                                                                                                                                                                                                                                                                  |
| EPI_ISL_12267825, EPI_ISL_12267826, EPI_ISL_12267827, EPI_ISL_12267828, EPI_ISL_12267829, EPI_ISL_12267830, EPI_ISL_12267831, EPI_ISL_12267832                                                                                                                                                                                                                                                                                                                                                                                                                                                                                                                                                                                                                                                                                                                                                                                                                                                                                                                                                                                                                                                                                                                                                                                                                                                                                                                                                                                                                                                                                                                                                                                                                                                                                                                                                                                                                                                                                                                                                                                                                                                                                                                                                                                                                                                                                                                                                                                                                                                                                                                                                                                                                                                                                                                                                                                                                                                                                                                                                                                                                                                                                                                                                                                                                                                                                                                                                                                                                                                                                                                                                                                                                                                                                                                                                                                                                                                                                                                                                                                                                                                                                                                                                                                                                                                                                                                                                                                                                                                                                                                                                                                                                                                                 | see above<br>Department of Respiratory and other Viral Infections of L.V. Gromashevsky Institute of Epidemiology and Infectious Diseases NAMS of Ukraine, 33 | CNR Virus des Infections Respiratoires - France SUD                                                                                                                                                       | Alla Mironenko; Antonin Bal; Bruno Lina; Bruno Simon; Gregory Destras; Gwendolyne Burfin; Hadrien Regue; Larysa Radchenko; Laurence Josset; Martine Valette; Nataliia Teteriuk; Quentin Semanas; Theophile Boyer                                                                                                                                                                                                |
| EPI_ISL_7395070, EPI_ISL_7396045, EPI_ISL_7396713, EPI_ISL_7397609, EPI_ISL_7755847, EPI_ISL_7756082, EPI_ISL_7756831, EPI_ISL_7757043, EPI_ISL_7757243, EPI_ISL_7757467, EPI_ISL_7757655, EPI_ISL_7758462, EPI_ISL_10047226, EPI_ISL_10047227, EPI_ISL_10047228, EPI_ISL_11866940, EPI_ISL_11866941, EPI_ISL_11866942, EPI_ISL_11866943, EPI_ISL_11866944, EPI_ISL_11866945, EPI_ISL_12063453, EPI_ISL_12063603, EPI_ISL_12063604, EPI_ISL_12249368, EPI_ISL_12249372, EPI_ISL_12249374, EPI_ISL_12249377, EPI_ISL_12249380, EPI_ISL_12249423                                                                                                                                                                                                                                                                                                                                                                                                                                                                                                                                                                                                                                                                                                                                                                                                                                                                                                                                                                                                                                                                                                                                                                                                                                                                                                                                                                                                                                                                                                                                                                                                                                                                                                                                                                                                                                                                                                                                                                                                                                                                                                                                                                                                                                                                                                                                                                                                                                                                                                                                                                                                                                                                                                                                                                                                                                                                                                                                                                                                                                                                                                                                                                                                                                                                                                                                                                                                                                                                                                                                                                                                                                                                                                                                                                                                                                                                                                                                                                                                                                                                                                                                                                                                                                                                 | see above<br>Department of Respiratory and other Viral Infections of L.V. Gromashevsky Institute of Epidemiology & Infectious Diseases NAMS of Ukraine       | Department of Respiratory and other Viral Infections of L.V. Gromashevsky Institute of Epidemiology & Infectious Diseases NAMS of Ukraine, JSC "Farmak"                                                   | Alla Mironenko; Andriy Goy; Ihor Kravchuk; Larysa Radchenko; Mykola Pydiura; Nataliia Teteriuk; Pydiura Mykola                                                                                                                                                                                                                                                                                                  |
| EPI_ISL_10717566, EPI_ISL_10717567, EPI_ISL_10717568, EPI_ISL_10717569, EPI_ISL_10717570, EPI_ISL_10717571, EPI_ISL_10717572, EPI_ISL_10717573                                                                                                                                                                                                                                                                                                                                                                                                                                                                                                                                                                                                                                                                                                                                                                                                                                                                                                                                                                                                                                                                                                                                                                                                                                                                                                                                                                                                                                                                                                                                                                                                                                                                                                                                                                                                                                                                                                                                                                                                                                                                                                                                                                                                                                                                                                                                                                                                                                                                                                                                                                                                                                                                                                                                                                                                                                                                                                                                                                                                                                                                                                                                                                                                                                                                                                                                                                                                                                                                                                                                                                                                                                                                                                                                                                                                                                                                                                                                                                                                                                                                                                                                                                                                                                                                                                                                                                                                                                                                                                                                                                                                                                                                 | see above<br>L.V.GROMASHEVSKY                                                                                                                                | CNR Virus des Infections Respiratoires - France SUD                                                                                                                                                       | Antonin Bal; Bruno Lina; Bruno Simon; Gregory Destras; Gwendolyne Burfin; Hadrien Regue; Laurence Josset; Martine Valette; Quentin Semanas; Theophile Boyer                                                                                                                                                                                                                                                     |
| EPI_ISL_7987086<br>EPI_ISL_9479659                                                                                                                                                                                                                                                                                                                                                                                                                                                                                                                                                                                                                                                                                                                                                                                                                                                                                                                                                                                                                                                                                                                                                                                                                                                                                                                                                                                                                                                                                                                                                                                                                                                                                                                                                                                                                                                                                                                                                                                                                                                                                                                                                                                                                                                                                                                                                                                                                                                                                                                                                                                                                                                                                                                                                                                                                                                                                                                                                                                                                                                                                                                                                                                                                                                                                                                                                                                                                                                                                                                                                                                                                                                                                                                                                                                                                                                                                                                                                                                                                                                                                                                                                                                                                                                                                                                                                                                                                                                                                                                                                                                                                                                                                                                                                                             | Medical laboratory "Dila"<br>Platform BIS UZA/UAntwerpen                                                                                                     | Medical laboratory "Dila"<br>Labo Klinische Biologie, UZA                                                                                                                                                 | B.Shpyga; D.Negrulia; K.Nekrasov; Y.Natalych<br>Basil Britto Xavier; Christine Lammens; Herman Goossens; Ines Verbesselt; Jasmine Coppens; Kathleen Holemans; Marie Le Mercier; Veerle Matheussen                                                                                                                                                                                                               |
| EPI_ISL_7967972, EPI_ISL_7967973, EPI_ISL_7967974, EPI_ISL_7967975, EPI_ISL_7967976, EPI_ISL_7967977, EPI_ISL_7967978, EPI_ISL_7967979, EPI_ISL_7967980, EPI_ISL_7967981, EPI_ISL_7967982, EPI_ISL_7967983, EPI_ISL_7967984, EPI_ISL_7967985, EPI_ISL_7967986, EPI_ISL_7967987, EPI_ISL_7967988, EPI_ISL_7967989, EPI_ISL_7967990, EPI_ISL_7967991, EPI_ISL_7967992, EPI_ISL_7967993, EPI_ISL_7967994, EPI_ISL_7967995, EPI_ISL_7967996, EPI_ISL_7967997, EPI_ISL_7967998, EPI_ISL_7967999, EPI_ISL_7968000, EPI_ISL_7968001, EPI_ISL_7968002, EPI_ISL_7968003, EPI_ISL_7968004, EPI_ISL_7968005, EPI_ISL_7968006, EPI_ISL_7968007, EPI_ISL_7968008, EPI_ISL_7968009, EPI_ISL_7968010, EPI_ISL_7968011, EPI_ISL_7968012, EPI_ISL_7968013, EPI_ISL_8645799, EPI_ISL_8645800, EPI_ISL_8645801, EPI_ISL_8645802, EPI_ISL_8645803, EPI_ISL_8645804, EPI_ISL_8645805, EPI_ISL_8645806, EPI_ISL_8645807, EPI_ISL_8645808, EPI_ISL_8645809, EPI_ISL_8645810, EPI_ISL_8645811, EPI_ISL_8645812, EPI_ISL_8645813, EPI_ISL_8645814, EPI_ISL_8645815, EPI_ISL_8645816, EPI_ISL_8645817, EPI_ISL_8645818, EPI_ISL_8645819, EPI_ISL_8645820, EPI_ISL_8645821, EPI_ISL_8645822, EPI_ISL_8645823, EPI_ISL_8645824, EPI_ISL_8645825, EPI_ISL_8645826, EPI_ISL_8645827, EPI_ISL_8645828, EPI_ISL_8645829, EPI_ISL_8645830, EPI_ISL_8645831, EPI_ISL_8645832, EPI_ISL_8645833, EPI_ISL_8645834, EPI_ISL_8645835, EPI_ISL_8645836, EPI_ISL_8645837, EPI_ISL_8645838, EPI_ISL_8645839, EPI_ISL_8645840, EPI_ISL_8645841, EPI_ISL_8645842, EPI_ISL_8645843, EPI_ISL_8645844, EPI_ISL_8645845, EPI_ISL_8645846, EPI_ISL_8645847, EPI_ISL_8645848, EPI_ISL_8645849, EPI_ISL_8645850, EPI_ISL_8645851, EPI_ISL_8645852, EPI_ISL_8645853, EPI_ISL_8645854, EPI_ISL_8645855, EPI_ISL_8645856, EPI_ISL_8645857, EPI_ISL_8645858, EPI_ISL_8645859, EPI_ISL_8645860, EPI_ISL_8645861, EPI_ISL_8645862, EPI_ISL_8645863, EPI_ISL_8645864, EPI_ISL_8645865, EPI_ISL_8645866, EPI_ISL_8645867, EPI_ISL_8645868, EPI_ISL_8645869, EPI_ISL_8645870, EPI_ISL_8645871, EPI_ISL_8645872, EPI_ISL_8645873, EPI_ISL_8645874, EPI_ISL_8645875, EPI_ISL_8645876, EPI_ISL_8645877, EPI_ISL_8645878, EPI_ISL_8645879, EPI_ISL_8645880, EPI_ISL_8645881, EPI_ISL_8645882, EPI_ISL_8645883, EPI_ISL_8645884, EPI_ISL_8645885, EPI_ISL_8645886, EPI_ISL_8645887, EPI_ISL_8645888, EPI_ISL_8645889, EPI_ISL_8645890, EPI_ISL_8645891, EPI_ISL_8645892, EPI_ISL_8645893, EPI_ISL_8645894, EPI_ISL_8645895, EPI_ISL_8645896, EPI_ISL_8645897, EPI_ISL_8645898, EPI_ISL_8645899, EPI_ISL_8645900, EPI_ISL_8645901, EPI_ISL_8645902, EPI_ISL_8645903, EPI_ISL_8645904, EPI_ISL_8645905, EPI_ISL_8645906, EPI_ISL_8645907, EPI_ISL_8645908, EPI_ISL_8645909, EPI_ISL_8645910, EPI_ISL_8645911, EPI_ISL_8645912, EPI_ISL_8645913, EPI_ISL_8645914, EPI_ISL_8645915, EPI_ISL_8645916, EPI_ISL_8645917, EPI_ISL_8645918, EPI_ISL_8645919, EPI_ISL_8645920, EPI_ISL_8645921, EPI_ISL_8645922, EPI_ISL_8645923, EPI_ISL_8645924, EPI_ISL_8645925, EPI_ISL_8645926, EPI_ISL_8645927, EPI_ISL_8645928, EPI_ISL_8645929, EPI_ISL_8645930, EPI_ISL_8645931, EPI_ISL_8645932, EPI_ISL_8645933, EPI_ISL_8645934, EPI_ISL_8645935, EPI_ISL_8645936, EPI_ISL_8645937, EPI_ISL_8645938, EPI_ISL_8645939, EPI_ISL_8645940, EPI_ISL_8645941, EPI_ISL_8645942, EPI_ISL_8645943, EPI_ISL_8645944, EPI_ISL_8645945, EPI_ISL_8645946, EPI_ISL_8645947, EPI_ISL_8645948, EPI_ISL_8645949, EPI_ISL_8645950, EPI_ISL_8645951, EPI_ISL_8645952, EPI_ISL_8645953, EPI_ISL_8645954, EPI_ISL_8645955, EPI_ISL_8645956, EPI_ISL_8645957, EPI_ISL_8645958, EPI_ISL_8645959, EPI_ISL_8645960, EPI_ISL_8645961, EPI_ISL_8645962, EPI_ISL_8645963, EPI_ISL_8645964, EPI_ISL_8645965, EPI_ISL_8645966, EPI_ISL_8645967, EPI_ISL_8645968, EPI_ISL_8645969, EPI_ISL_8645970, EPI_ISL_8645971, EPI_ISL_8645972, EPI_ISL_8645973, EPI_ISL_8645974, EPI_ISL_8645975, EPI_ISL_8645976, EPI_ISL_8645977, EPI_ISL_8645978, EPI_ISL_8645979, EPI_ISL_8645980, EPI_ISL_8645981, EPI_ISL_8645982, EPI_ISL_8645983, EPI_ISL_8645984, EPI_ISL_8645985, EPI_ISL_8645986, EPI_ISL_8645987, EPI_ISL_8645988, EPI_ISL_8645989, EPI_ISL_8645990, EPI_ISL_8645991, EPI_ISL_8645992, EPI_ISL_8645993, EPI_ISL_8645994, EPI_ISL_8645995, EPI_ISL_8645996, EPI_ISL_8645997, EPI_ISL_8645998, EPI_ISL_8645999, EPI_ISL_8646000, EPI_ISL_8646001, EPI_ISL_8646002, EPI_ISL_8646003, EPI_ISL_8646004, EPI_ISL_8646005, EPI_ISL_8646006, EPI_ISL_8646007, EPI_ISL_8646008, EPI_ISL_8646009, EPI_ISL_8646010, EPI_ISL_8646011, EPI_ISL_8646012, EPI_ISL_8646013, EPI_ISL_8646014, EPI_ISL_8646015, EPI_ISL_8646016, EPI_ISL_8646017, EPI_ISL_8646018, EPI_ISL_8646019, EPI_ISL_8646020, EPI_ISL_8646021, EPI_ISL_8646022, EPI_ISL_8646023, EPI_ISL_8646024, EPI_ISL_8646025, EPI_ISL_8646026, EPI_ISL_8646027, EPI_ISL_8646028 | see above<br>SI «Public Health Center of MHU»<br>The Institute of Molecular Biology and Genetics of NASU                                                     | M.Tukalo et al.                                                                                                                                                                                           |                                                                                                                                                                                                                                                                                                                                                                                                                 |
| EPI_ISL_9662954, EPI_ISL_9662955, EPI_ISL_9662956, EPI_ISL_9662957, EPI_ISL_9662958, EPI_ISL_9662959, EPI_ISL_9662960, EPI_ISL_9662961, EPI_ISL_9662962, EPI_ISL_9662963, EPI_ISL_9662964, EPI_ISL_9662965, EPI_ISL_9662966, EPI_ISL_9662967, EPI_ISL_9662968, EPI_ISL_9662969, EPI_ISL_9662970, EPI_ISL_9662971, EPI_ISL_9662972, EPI_ISL_9662973, EPI_ISL_9662974, EPI_ISL_9662975, EPI_ISL_9662976, EPI_ISL_9662977, EPI_ISL_9662978, EPI_ISL_9662979, EPI_ISL_9662980, EPI_ISL_9662981, EPI_ISL_9662982, EPI_ISL_9662983, EPI_ISL_9662984, EPI_ISL_9662985, EPI_ISL_9662986, EPI_ISL_9662987, EPI_ISL_9662988, EPI_ISL_9662989, EPI_ISL_9662990, EPI_ISL_9662991, EPI_ISL_9662992, EPI_ISL_9662993, EPI_ISL_9662994, EPI_ISL_9662995, EPI_ISL_9662996, EPI_ISL_9662997, EPI_ISL_9662998, EPI_ISL_9662999, EPI_ISL_9663000, EPI_ISL_9663001, EPI_ISL_9663002, EPI_ISL_9663003, EPI_ISL_9663004, EPI_ISL_9663005, EPI_ISL_9663006, EPI_ISL_9663007, EPI_ISL_9663008, EPI_ISL_9663009, EPI_ISL_9663010, EPI_ISL_9663011, EPI_ISL_9663012, EPI_ISL_9663013, EPI_ISL_9663014, EPI_ISL_9663015, EPI_ISL_9663016, EPI_ISL_9663017, EPI_ISL_9663018, EPI_ISL_9663019, EPI_ISL_9663020, EPI_ISL_9663021, EPI_ISL_9663022, EPI_ISL_9663023, EPI_ISL_9663024, EPI_ISL_9663025, EPI_ISL_9663026, EPI_ISL_9663027, EPI_ISL_9663028                                                                                                                                                                                                                                                                                                                                                                                                                                                                                                                                                                                                                                                                                                                                                                                                                                                                                                                                                                                                                                                                                                                                                                                                                                                                                                                                                                                                                                                                                                                                                                                                                                                                                                                                                                                                                                                                                                                                                                                                                                                                                                                                                                                                                                                                                                                                                                                                                                                                                                                                                                                                                                                                                                                                                                                                                                                                                                                                                                                                                                                                                                                                                                                                                                                                                                                                                                                                                                                                                      | see above<br>State Institution "Kyiv City Center for Control and Prevention of Diseases of Ministry of Health of Ukraine"                                    | L.V. Gromashevsky Institute of Epidemiology and Infectious Diseases of the NAMS of Ukraine                                                                                                                | Alla M. Scherbinska; Anna Yakovleva; Eric Bortz; Ganna Kovalenko; Ian Goodfellow; Joel O. Wertheim; Luke Meredith; Mariia G. Liulchuk; Matthew Redlinger; Tetyana I. Vasylyeva; Viktoria I. Zadorozhna                                                                                                                                                                                                          |

We gratefully acknowledge the following Authors from the Originating laboratories responsible for obtaining the specimens, as well as the Submitting laboratories where the genome data were generated and shared via GISAID, on which this research is based.

All Submitters of data may be contacted directly via [www.gisaid.org](http://www.gisaid.org)

| Accession ID                                                                                                                                                                                                                                                                                                                                                                                                                                                                                                                                                                                                                                                                                                                                                                                                                                                                                                                                                                                                                                              | Originating Laboratory                                                                                                                                                                                                                                                                                                                                                                                                                | Submitting Laboratory                                                                                                                                                                                                                                                                                                                                                                                                                                                                                                                                                                                                      | Authors                                                                                                                                                                                                                                                                                                                                                                                                                   |
|-----------------------------------------------------------------------------------------------------------------------------------------------------------------------------------------------------------------------------------------------------------------------------------------------------------------------------------------------------------------------------------------------------------------------------------------------------------------------------------------------------------------------------------------------------------------------------------------------------------------------------------------------------------------------------------------------------------------------------------------------------------------------------------------------------------------------------------------------------------------------------------------------------------------------------------------------------------------------------------------------------------------------------------------------------------|---------------------------------------------------------------------------------------------------------------------------------------------------------------------------------------------------------------------------------------------------------------------------------------------------------------------------------------------------------------------------------------------------------------------------------------|----------------------------------------------------------------------------------------------------------------------------------------------------------------------------------------------------------------------------------------------------------------------------------------------------------------------------------------------------------------------------------------------------------------------------------------------------------------------------------------------------------------------------------------------------------------------------------------------------------------------------|---------------------------------------------------------------------------------------------------------------------------------------------------------------------------------------------------------------------------------------------------------------------------------------------------------------------------------------------------------------------------------------------------------------------------|
| EPI_ISL_733077, EPI_ISL_733078, EPI_ISL_733151, EPI_ISL_733433, EPI_ISL_733452, EPI_ISL_1400527, EPI_ISL_1400557<br>see above                                                                                                                                                                                                                                                                                                                                                                                                                                                                                                                                                                                                                                                                                                                                                                                                                                                                                                                             | HELIX LLC                                                                                                                                                                                                                                                                                                                                                                                                                             | WHO National Influenza Centre Russian Federation                                                                                                                                                                                                                                                                                                                                                                                                                                                                                                                                                                           | Andrey Komissarov; Anna Ivanova; Artem Fadeev; Daria Danilenko; Dmitry Bazhenov; Dmitry Lioznov; Elena Nabieva; Georgii Bazykin; Ksenia Safina; Kseniya Komissarova                                                                                                                                                                                                                                                       |
| EPI_ISL_3932047, EPI_ISL_3996685, EPI_ISL_3996686, EPI_ISL_3996687, EPI_ISL_3996688<br>EPI_ISL_2031957                                                                                                                                                                                                                                                                                                                                                                                                                                                                                                                                                                                                                                                                                                                                                                                                                                                                                                                                                    | Molecular Diagnostic Laboratory of Federal Budget Institution of Science at the Central Research Institute of Epidemiology of the Federal Service on Customers' Rights Protection and Human Well-being Surveillance<br>Molecular diagnostic laboratory of Federal Budget Institution of Science "Central Research Institute of Epidemiology" of The Federal Service on Customers' Rights Protection and Human Well-being Surveillance | Group of Genomics and Postgenomic Technologies of Central Research Institute of Epidemiology<br>Group of Genomics and Postgenomic Technologies of Central Research Institute of Epidemiology                                                                                                                                                                                                                                                                                                                                                                                                                               | Akimkin V.G.; Berlina Y.Y.; Buharina A.Y.; Kaptelova V.V.; Kondrasheva L.Y.; Korneenko E.V.; Nadtoka M.I.; Roev G.V.; Saenko S.S.; Samoilov A.E.; Shipulina O.Y.; Sinityn S.O.; Smirnova Y.S.; Speranskaya A.S.; Vyhodceva A.V.<br>Akimkin V.G.; Kaptelova V.V.; Kondrasheva L.Y.; Korneenko E.V.; Nadtoka M.I.; Saenko S.S.; Samojlov A.E.; Shipulina O.Y.; Sinicyn S.O.; Smirnova Y.S.; Speranskaya A.S.; Tivanova E.V. |
| EPI_ISL_3101330, EPI_ISL_3101347, EPI_ISL_4536678, EPI_ISL_4536683, EPI_ISL_4536741, EPI_ISL_4536770, EPI_ISL_4558178, EPI_ISL_5306854, EPI_ISL_6642293, EPI_ISL_6642294, EPI_ISL_6642295, EPI_ISL_6642296, EPI_ISL_6642297, EPI_ISL_6901054, EPI_ISL_6901055, EPI_ISL_6901056, EPI_ISL_6901057, EPI_ISL_6901058, EPI_ISL_6901059, EPI_ISL_6901060, EPI_ISL_6901061, EPI_ISL_6901062, EPI_ISL_6901063, EPI_ISL_6901064, EPI_ISL_6901065, EPI_ISL_6901066, EPI_ISL_6901067, EPI_ISL_6901068, EPI_ISL_6901069, EPI_ISL_6901070, EPI_ISL_6901071, EPI_ISL_6901072, EPI_ISL_7688591, EPI_ISL_7688592, EPI_ISL_7688593, EPI_ISL_7688594, EPI_ISL_7688595, EPI_ISL_7688596, EPI_ISL_7688597, EPI_ISL_7688598, EPI_ISL_7688599, EPI_ISL_7688600, EPI_ISL_7688601, EPI_ISL_7688602, EPI_ISL_7688603, EPI_ISL_7688604, EPI_ISL_7717358, EPI_ISL_7717549, EPI_ISL_7717550, EPI_ISL_7717572, EPI_ISL_7717584, EPI_ISL_7717617, EPI_ISL_8189424, EPI_ISL_8540303, EPI_ISL_8540330, EPI_ISL_8540337, EPI_ISL_11359717, EPI_ISL_11359718, EPI_ISL_11359719<br>see above | Molecular diagnostic laboratory of Federal Budget Institution of Science "Central Research Institute of Epidemiology" of The Federal Service on Customers' Rights Protection and Human Well-being Surveillance<br>Group of Genomics and Postgenomic Technologies of Central Research Institute of Epidemiology                                                                                                                        | Group of Genomics and Postgenomic Technologies of Central Research Institute of Epidemiology<br>Akimkin V.G.; Azarova V.S.; Berlina Y.Y.; Borzova S.I.; Buharina A.Y.; Bulanenko V.P.; Cherkashina A.S.; Chudinov I.K.; Dohoyan A.Y.; Dolotova S.M.; Golubeva A.G.; Goncharov S.E.; Gul'boj E.Y.; Kaptelova V.V.; Kochetova E.V.; Kondrasheva L.Y.; Korneenko E.V.; Markina N.V.; Nadtoka M.I.; Noskova O.M.; Roev G.V.; Saenko S.S.; Samoilov A.E.; Selezov S.Y.; Shipulina O.Y.; Sinityn S.O.; Smirnova Y.S.; Solovieva E.D.; Speranskaya A.S.; Svetlichnyj D.V.; Valdohina A.V.; Vyhodceva A.V.; Zotova M.I.; Zuev S.N. |                                                                                                                                                                                                                                                                                                                                                                                                                           |
| EPI_ISL_3122988, EPI_ISL_3122989, EPI_ISL_3122990, EPI_ISL_3122991, EPI_ISL_3122992, EPI_ISL_3122993, EPI_ISL_3122994, EPI_ISL_3122995, EPI_ISL_3122996, EPI_ISL_3122997<br>see above                                                                                                                                                                                                                                                                                                                                                                                                                                                                                                                                                                                                                                                                                                                                                                                                                                                                     | Republican Children's Clinical Infectious Diseases Hospital                                                                                                                                                                                                                                                                                                                                                                           | WHO National Influenza Centre Russian Federation                                                                                                                                                                                                                                                                                                                                                                                                                                                                                                                                                                           | Alexey Masharsky; Andrey Komissarov; Artem Fadeev; Daria Danilenko; Dmitry Lioznov; Elena Nabieva; Georgii Bazykin; Kirill Varchenko; Ksenia Safina; Kseniya Komissarova; Maria Baturova; Maria Pisareva; Mikhail Bakaev; Nikita Yolshin; Oula Mansour; Tamila Musaeva; Veronika Eder                                                                                                                                     |
| EPI_ISL_8007819, EPI_ISL_8007821, EPI_ISL_8007822, EPI_ISL_8007823, EPI_ISL_8007824, EPI_ISL_8007825, EPI_ISL_8007827, EPI_ISL_8783298, EPI_ISL_8783299, EPI_ISL_8783300, EPI_ISL_8783301, EPI_ISL_8783302, EPI_ISL_8783303, EPI_ISL_8783304, EPI_ISL_8783305, EPI_ISL_8783306, EPI_ISL_8783307, EPI_ISL_8783308, EPI_ISL_8783309, EPI_ISL_8783310, EPI_ISL_8783311, EPI_ISL_8783312, EPI_ISL_8783313, EPI_ISL_8783314, EPI_ISL_8783315, EPI_ISL_8783316<br>see above                                                                                                                                                                                                                                                                                                                                                                                                                                                                                                                                                                                     | Sevastopol Municipal Infectious Diseases Hospital                                                                                                                                                                                                                                                                                                                                                                                     | WHO National Influenza Centre Russian Federation                                                                                                                                                                                                                                                                                                                                                                                                                                                                                                                                                                           | Andrey Komissarov; Artem Fadeev; Daria Danilenko; Dmitry Lioznov; Elena Nabieva; Georgii Bazykin; Kirill Varchenko; Ksenia Safina; Kseniya Komissarova; Maria Pisareva; Mikhail Bakaev; Nikita Yolshin; Oula Mansour; Tamila Musaeva; Veronika Eder                                                                                                                                                                       |
| EPI_ISL_428901                                                                                                                                                                                                                                                                                                                                                                                                                                                                                                                                                                                                                                                                                                                                                                                                                                                                                                                                                                                                                                            | State Research Center of Virology and Biotechnology VECTOR, Department of Collection of Microorganisms                                                                                                                                                                                                                                                                                                                                | State Research Center of Virology and Biotechnology VECTOR, Department of Collection of Microorganisms                                                                                                                                                                                                                                                                                                                                                                                                                                                                                                                     | Alexander N. Shvalov; Elena V. Gavrilova; Oleg V. Pyankov; Rinat A. Maksyutov; Sergey A. Bodnev; Tatyana V. Tregubchak                                                                                                                                                                                                                                                                                                    |
